# Supplementary material for: Deep Generative Optimization of mRNA Codon Sequences for Enhanced Protein Production and Therapeutic Efficacy
Source: Research Square preprint supplement (doi:10.21203/rs.3.rs-5040961/v1), 2024-11-05
Supplement: Supplementary file 1 [file 4c59e43d897ea14c01bd1863.xlsx]

## Sheet: samples
Studies	RiboSeq_GSM	RNASeq_GSM	Cell	Condition	Type
GSE100007	GSM2667787	GSM2667789	hESC	normal	training
GSE100007	GSM2667788	GSM2667790	hESC	normal	training
GSE48933	GSM1187134	GSM1187136	BJ	normal	training
GSE48933	GSM1187135	GSM1187137	BJ	normal	training
GSE41605	GSM1020235	GSM1020245	fibroblasts	treatment	training
GSE41605	GSM1020242	GSM1020244	fibroblasts	treatment	training
GSE41605	GSM1020238	GSM1020244	fibroblasts	treatment	training
GSE41605	GSM1020240	GSM1020247	fibroblasts	treatment	training
GSE41605	GSM1020243	GSM1020246	fibroblasts	treatment	training
GSE41605	GSM1020236	GSM1020246	fibroblasts	treatment	training
GSE41605	GSM1020237	GSM1020249	fibroblasts	treatment	training
GSE41605	GSM1020239	GSM1020246	fibroblasts	treatment	training
GSE41605	GSM1020241	GSM1020249	fibroblasts	treatment	training
GSE41605	GSM1020234	GSM1020244	fibroblasts	treatment	training
GSE42509	GSM1047589	GSM1041198	BJ	treatment	training
GSE42509	GSM1047590	GSM1041197	BJ	normal	training
GSE42509	GSM1047591	GSM1041199	BJ	treatment	training
GSE64962	GSM1585210	GSM1585204	fibroblasts	treatment	training
GSE64962	GSM1585211	GSM1585205	fibroblasts	treatment	training
GSE64962	GSM1585213	GSM1585207	fibroblasts	treatment	training
GSE65885	GSM1608285	GSM1608282	BJ	normal	training
GSE65885	GSM1608286	GSM1608283	BJ	normal	training
GSE65885	GSM1608287	GSM1608284	BJ	normal	training
GSE65885	GSM1608291	GSM1608282	BJ	normal	training
GSE65885	GSM1608288	GSM1608282	BJ	normal	training
GSE65885	GSM1608294	GSM1608282	BJ	normal	training
GSE65885	GSM1608292	GSM1608283	BJ	normal	training
GSE65885	GSM1608289	GSM1608283	BJ	normal	training
GSE65885	GSM1608295	GSM1608283	BJ	normal	training
GSE65885	GSM1608293	GSM1608284	BJ	normal	training
GSE65885	GSM1608290	GSM1608284	BJ	normal	training
GSE65885	GSM1608296	GSM1608284	BJ	normal	training
GSE69906	GSM1712271	GSM1712278	fibroblasts	normal	training
GSE69906	GSM1712273	GSM1712280	fibroblasts	treatment	training
GSE69906	GSM1712274	GSM1712281	fibroblasts	treatment	training
GSE67902	GSM1657720	GSM1657726	RPE-1	normal	training
GSE67902	GSM1657721	GSM1657727	RPE-1	normal	training
GSE67902	GSM1657722	GSM1657728	RPE-1	normal	training
GSE67902	GSM1657723	GSM1657729	RPE-1	normal	training
GSE67902	GSM1657724	GSM1657730	RPE-1	normal	training
GSE35469	GSM869037	GSM869036	PC3	normal	training
GSE35469	GSM869039	GSM869038	PC3	treatment	training
GSE35469	GSM869041	GSM869040	PC3	treatment	training
GSE35469	GSM869043	GSM869042	PC3	normal	training
GSE35469	GSM869045	GSM869044	PC3	treatment	training
GSE35469	GSM869047	GSM869046	PC3	treatment	training
GSE56924	GSM1371443	GSM1371395	U2OS	normal	test
GSE56924	GSM1371444	GSM1371396	U2OS	normal	test
GSE56924	GSM1371445	GSM1371397	U2OS	normal	test
GSE56924	GSM1371446	GSM1371398	U2OS	normal	test
GSE56924	GSM1371447	GSM1371399	U2OS	normal	test
GSE56924	GSM1371448	GSM1371400	U2OS	normal	test
GSE56924	GSM1371449	GSM1371401	U2OS	normal	test
GSE56924	GSM1371450	GSM1371402	U2OS	normal	test
GSE56924	GSM1371451	GSM1371403	U2OS	normal	test
GSE56924	GSM1371452	GSM1371404	U2OS	normal	test
GSE56924	GSM1371453	GSM1371405	U2OS	normal	test
GSE56924	GSM1371454	GSM1371406	U2OS	normal	test
GSE56924	GSM1371455	GSM1371407	U2OS	normal	test
GSE56924	GSM1371456	GSM1371408	U2OS	normal	test
GSE56924	GSM1371457	GSM1371409	U2OS	normal	test
GSE56924	GSM1371458	GSM1371410	U2OS	normal	test
GSE56924	GSM1371459	GSM1371411	U2OS	normal	test
GSE56924	GSM1371460	GSM1371412	U2OS	normal	test
GSE56924	GSM1371461	GSM1371413	U2OS	normal	test
GSE56924	GSM1371462	GSM1371414	U2OS	normal	test
GSE56924	GSM1371463	GSM1371415	U2OS	normal	test
GSE56924	GSM1371464	GSM1371416	U2OS	normal	test
GSE56924	GSM1371465	GSM1371417	U2OS	normal	test
GSE56924	GSM1371466	GSM1371418	U2OS	normal	test
GSE56924	GSM1371467	GSM1371419	U2OS	treatment	test
GSE56924	GSM1371468	GSM1371420	U2OS	treatment	test
GSE56924	GSM1371469	GSM1371421	U2OS	treatment	test
GSE56924	GSM1371470	GSM1371422	U2OS	treatment	test
GSE56924	GSM1371471	GSM1371423	U2OS	treatment	test
GSE56924	GSM1371472	GSM1371424	U2OS	treatment	test
GSE56924	GSM1371473	GSM1371425	U2OS	treatment	test
GSE56924	GSM1371474	GSM1371426	U2OS	treatment	test
GSE56924	GSM1371475	GSM1371427	U2OS	treatment	test
GSE56924	GSM1371476	GSM1371428	U2OS	treatment	test
GSE56924	GSM1371477	GSM1371429	U2OS	treatment	test
GSE56924	GSM1371478	GSM1371430	U2OS	treatment	test
GSE56924	GSM1371479	GSM1371431	U2OS	treatment	test
GSE56924	GSM1371480	GSM1371432	U2OS	treatment	test
GSE56924	GSM1371481	GSM1371433	U2OS	treatment	test
GSE56924	GSM1371482	GSM1371434	U2OS	treatment	test
GSE56924	GSM1371483	GSM1371435	U2OS	treatment	test
GSE56924	GSM1371484	GSM1371436	U2OS	treatment	test
GSE56924	GSM1371485	GSM1371437	U2OS	treatment	test
GSE56924	GSM1371486	GSM1371438	U2OS	treatment	test
GSE56924	GSM1371487	GSM1371439	U2OS	treatment	test
GSE56924	GSM1371488	GSM1371440	U2OS	treatment	test
GSE56924	GSM1371489	GSM1371441	U2OS	treatment	test
GSE56924	GSM1371490	GSM1371442	U2OS	treatment	test
GSE60426	GSM1479596	GSM1479593	U2OS	treatment	test
GSE60426	GSM1479592	GSM1479589	U2OS	treatment	test
GSE60426	GSM1479588	GSM1479585	U2OS	normal	test
GSE100007	GSM2667791	GSM2667793	neural	normal	training
GSE100007	GSM2667792	GSM2667794	neural	normal	training
GSE100007	GSM2667795	GSM2667797	neural	normal	training
GSE100007	GSM2667796	GSM2667798	neural	normal	training
GSE78959	GSM2082522	GSM2082510	neuron	normal	test
GSE78959	GSM2082524	GSM2082512	neuron	treatment	test
GSE78959	GSM2082525	GSM2082513	neuron	treatment	test
GSE78959	GSM2082526	GSM2082514	neuron	treatment	test
GSE78959	GSM2082528	GSM2082516	neuron	normal	test
GSE78959	GSM2082530	GSM2082518	neuron	treatment	test
GSE78959	GSM2082531	GSM2082519	neuron	treatment	test
GSE78959	GSM2082532	GSM2082520	neuron	treatment	test
GSE78960	GSM2082533	GSM2082535	neuron	treatment	test
GSE78960	GSM2082534	GSM2082536	neuron	treatment	test
GSE78960	GSM2082537	GSM2082539	neuron	normal	test
GSE78960	GSM2082538	GSM2082540	neuron	normal	test
GSE78960	GSM2082541	GSM2082543	neuron	treatment	test
GSE78960	GSM2082542	GSM2082544	neuron	treatment	test
GSE78960	GSM2082545	GSM2082547	neuron	treatment	test
GSE78960	GSM2082546	GSM2082548	neuron	treatment	test
GSE78960	GSM2082549	GSM2082551	neuron	normal	test
GSE78960	GSM2082553	GSM2082555	neuron	treatment	test
GSE78960	GSM2082554	GSM2082556	neuron	treatment	test
GSE78960	GSM2082557	GSM2082559	neuron	treatment	test
GSE78960	GSM2082558	GSM2082560	neuron	treatment	test
GSE78960	GSM2082561	GSM2082563	neuron	treatment	test
GSE78960	GSM2082565	GSM2082567	neuron	treatment	test
GSE78960	GSM2082566	GSM2082568	neuron	treatment	test
GSE78960	GSM2082569	GSM2082571	neuron	treatment	test
GSE78960	GSM2082570	GSM2082572	neuron	treatment	test
GSE78960	GSM2082574	GSM2082576	neuron	treatment	test
GSE78960	GSM2082578	GSM2082580	neuron	treatment	test
GSE101760	GSM2714725	GSM2714729	A549	normal	training
GSE101760	GSM2714726	GSM2714730	A549	treatment	training
GSE101760	GSM2714727	GSM2714731	A549	normal	training
GSE101760	GSM2714728	GSM2714732	A549	treatment	training
GSE101760	GSM2714737	GSM2714733	A549	treatment	training
GSE101760	GSM2714738	GSM2714734	A549	normal	training
GSE101760	GSM2714739	GSM2714735	A549	treatment	training
GSE101760	GSM2714740	GSM2714736	A549	normal	training
GSE82232	GSM2186918	GSM2186926	A549	normal	training
GSE82232	GSM2186919	GSM2186927	A549	treatment	training
GSE82232	GSM2186920	GSM2186928	A549	treatment	training
GSE82232	GSM2186922	GSM2186930	A549	normal	training
GSE96716	GSM2538903	GSM2538901	PC9	normal	training
GSE96716	GSM2538904	GSM2538902	H1933	normal	training
GSE69602	GSM1704503	GSM1704551	Huh7	treatment	training
GSE69602	GSM1704504	GSM1704552	Huh7	treatment	training
GSE69602	GSM1704505	GSM1704553	Huh7	treatment	training
GSE69602	GSM1704506	GSM1704554	Huh7	treatment	training
GSE69602	GSM1704507	GSM1704555	Huh7	treatment	training
GSE69602	GSM1704508	GSM1704556	Huh7	treatment	training
GSE69602	GSM1704509	GSM1704557	Huh7	treatment	training
GSE69602	GSM1704511	GSM1704559	Huh7	treatment	training
GSE69602	GSM1704512	GSM1704560	Huh7	treatment	training
GSE69602	GSM1704513	GSM1704561	Huh7	treatment	training
GSE69602	GSM1704514	GSM1704562	Huh7	treatment	training
GSE69602	GSM1704515	GSM1704563	Huh7	treatment	training
GSE69602	GSM1704516	GSM1704564	Huh7	treatment	training
GSE69602	GSM1704517	GSM1704565	Huh7	treatment	training
GSE69602	GSM1704518	GSM1704566	Huh7	treatment	training
GSE69602	GSM1704519	GSM1704567	Huh7	treatment	training
GSE69602	GSM1704520	GSM1704568	Huh7	treatment	training
GSE69602	GSM1704521	GSM1704569	Huh7	treatment	training
GSE69602	GSM1704522	GSM1704570	Huh7	treatment	training
GSE69602	GSM1704523	GSM1704571	Huh7	treatment	training
GSE69602	GSM1704524	GSM1704572	Huh7	treatment	training
GSE69602	GSM1704525	GSM1704573	Huh7	treatment	training
GSE69602	GSM1704526	GSM1704574	Huh7	treatment	training
GSE69602	GSM1704575	GSM1704597	Huh7	treatment	training
GSE69602	GSM1704576	GSM1704598	Huh7	treatment	training
GSE69602	GSM1704577	GSM1704599	Huh7	treatment	training
GSE69602	GSM1704578	GSM1704600	Huh7	treatment	training
GSE69602	GSM1704579	GSM1704601	Huh7	treatment	training
GSE69602	GSM1704580	GSM1704602	Huh7	treatment	training
GSE69602	GSM1704581	GSM1704603	Huh7	treatment	training
GSE69602	GSM1704582	GSM1704604	Huh7	treatment	training
GSE69602	GSM1704583	GSM1704605	Huh7	treatment	training
GSE69602	GSM1704584	GSM1704606	Huh7	treatment	training
GSE69602	GSM1704585	GSM1704607	Huh7	treatment	training
GSE69602	GSM1704586	GSM1704608	Huh7	treatment	training
GSE69602	GSM1704587	GSM1704609	Huh7	treatment	training
GSE69602	GSM1704588	GSM1704610	Huh7	treatment	training
GSE69602	GSM1704590	GSM1704612	Huh7	treatment	training
GSE69602	GSM1704591	GSM1704613	Huh7	treatment	training
GSE69602	GSM1704592	GSM1704614	Huh7	treatment	training
GSE69602	GSM1704593	GSM1704615	Huh7	treatment	training
GSE69602	GSM1704594	GSM1704616	Huh7	treatment	training
GSE69602	GSM1704595	GSM1704617	Huh7	treatment	training
GSE69602	GSM1704596	GSM1704618	Huh7	treatment	training
GSE94454	GSM2476015	GSM2476019	Huh7	treatment	training
GSE94454	GSM2476017	GSM2476021	Huh7	treatment	training
GSE70211	GSM1720805	GSM1720810	HEK293T	treatment	training
GSE70211	GSM1720806	GSM1720811	HEK293T	treatment	training
GSE70211	GSM1720807	GSM1720812	HEK293T	treatment	training
GSE70211	GSM1720814	GSM1720808	HEK293T	normal	training
GSE70211	GSM1720815	GSM1720809	HEK293T	normal	training
GSE52809	GSM1276542	GSM1276541	HEK293T	normal	training
GSE55195	GSM1331342	GSM1331343	HEK293T	normal	training
GSE55195	GSM1331344	GSM1331345	HEK293T	treatment	training
GSE55195	GSM1331346	GSM1331347	HEK293T	normal	training
GSE55195	GSM1331348	GSM1331349	HEK293T	treatment	training
GSE97384	GSM2563629	GSM2563633	HEK293T	normal	training
GSE97384	GSM2563630	GSM2563634	HEK293T	normal	training
GSE97384	GSM2563631	GSM2563635	HEK293T	treatment	training
GSE97384	GSM2563632	GSM2563636	HEK293T	treatment	training
GSE87328	GSM2327825	GSM2327829	HCT116	treatment	training
GSE87328	GSM2327827	GSM2327830	HCT116	normal	training
GSE48933	GSM1187138	GSM1187142	Cybrid	treatment	training
GSE48933	GSM1187140	GSM1187143	Cybrid	normal	training
GSE21992	GSM546920	GSM546921	HeLa	normal	test
GSE21992	GSM546922	GSM546923	HeLa	treatment	test
GSE21992	GSM546924	GSM546925	HeLa	treatment	test
GSE21992	GSM546926	GSM546927	HeLa	normal	test
GSE21992	GSM546928	GSM546929	HeLa	treatment	test
GSE21992	GSM546930	GSM546931	HeLa	treatment	test
GSE63591	GSM1717890	GSM1717891	HeLa	normal	test
GSE63591	GSM1717892	GSM1717893	HeLa	treatment	test
GSE63591	GSM1553248	GSM1553249	HeLa	normal	test
GSE63591	GSM1553250	GSM1553251	HeLa	treatment	test
GSE63591	GSM1553252	GSM1553253	HeLa	normal	test
GSE63591	GSM1553254	GSM1553255	HeLa	treatment	test
GSE73565	GSM1898010	GSM1898006	HeLa	normal	test
GSE73565	GSM1898011	GSM1898007	HeLa	normal	test
GSE73565	GSM1898012	GSM1898008	HeLa	normal	test
GSE73565	GSM1898013	GSM1898009	HeLa	normal	test
GSE73565	GSM1898018	GSM1898014	HeLa	normal	test
GSE73565	GSM1898019	GSM1898015	HeLa	normal	test
GSE73565	GSM1898020	GSM1898016	HeLa	normal	test
GSE73565	GSM1898021	GSM1898017	HeLa	normal	test
GSE79664	GSM2100596	GSM2100587	HeLa	normal	test
GSE79664	GSM2100597	GSM2100588	HeLa	normal	test
GSE79664	GSM2100598	GSM2100590	HeLa	normal	test
GSE79664	GSM2100599	GSM2100591	HeLa	normal	test
GSE79664	GSM2100600	GSM2100593	HeLa	normal	test
GSE79664	GSM2100601	GSM2100594	HeLa	normal	test
GSE79664	GSM2100602	GSM2100595	HeLa	normal	test
GSE83493	GSM2204389	GSM2204381	HeLa	normal	test
GSE83493	GSM2204390	GSM2204382	HeLa	normal	test
GSE83493	GSM2204391	GSM2204383	HeLa	normal	test
GSE83493	GSM2204392	GSM2204384	HeLa	normal	test
GSE83493	GSM2204393	GSM2204385	HeLa	treatment	test
GSE83493	GSM2204394	GSM2204386	HeLa	treatment	test
GSE83493	GSM2204395	GSM2204387	HeLa	treatment	test
GSE83493	GSM2204396	GSM2204388	HeLa	treatment	test
SRA099816	SAMN02344693	SAMN02344695	HeLa	normal	test
SRA099816	SAMN02344694	SAMN02344696	HeLa	normal	test
SRA099816	SAMN02344697	SAMN02344699	HeLa	normal	test
SRA099816	SAMN02344698	SAMN02344700	HeLa	normal	test
SRA099816	SAMN02344701	SAMN02344703	HeLa	normal	test
SRA099816	SAMN02344702	SAMN02344704	HeLa	normal	test
GSE59817	GSM1446846	GSM1446848	MCF	normal	training
GSE59817	GSM1446847	GSM1446849	MCF	treatment	training
GSE59818	GSM1446854	GSM1446858	MCF	normal	training
GSE59818	GSM1446855	GSM1446859	MCF	treatment	training
GSE59818	GSM1446856	GSM1446860	MCF	treatment	training
GSE59818	GSM1446857	GSM1446861	MCF	treatment	training
GSE61375	GSM1503434	GSM1503438	MDA-MB-231	normal	training
GSE61375	GSM1503436	GSM1503439	MDA-MB-231	treatment	training
GSE61375	GSM1503443	GSM1503445	MDA-MB-231	treatment	training
GSE65885	GSM1608268	GSM1608264	MCF	normal	training
GSE65885	GSM1608272	GSM1608264	MCF	normal	training
GSE65885	GSM1608269	GSM1608265	MCF	treatment	training
GSE65885	GSM1608279	GSM1608265	MCF	treatment	training
GSE65885	GSM1608273	GSM1608265	MCF	treatment	training
GSE65885	GSM1608271	GSM1608267	MCF	treatment	training
GSE65885	GSM1608281	GSM1608267	MCF	treatment	training
GSE65885	GSM1608275	GSM1608267	MCF	treatment	training
GSE65885	GSM1608270	GSM1608266	MCF	treatment	training
GSE65885	GSM1608280	GSM1608266	MCF	treatment	training
GSE65885	GSM1608274	GSM1608266	MCF	treatment	training
GSE65885	GSM1608276	GSM1608261	MCF	treatment	training
GSE65885	GSM1608278	GSM1608263	MCF	treatment	training
GSE65885	GSM1608277	GSM1608262	MCF	treatment	training
GSE77292	GSM2048204	GSM2048206	CN34	normal	training
GSE77292	GSM2048205	GSM2048207	CN34	normal	training
GSE77292	GSM2048208	GSM2048210	CN34	normal	training
GSE77292	GSM2048209	GSM2048211	CN34	normal	training
GSE77315	GSM2049157	GSM2049159	MDA	normal	training
GSE77315	GSM2049158	GSM2049160	MDA	normal	training
GSE77315	GSM2049161	GSM2049163	MDA	normal	training
GSE77315	GSM2049162	GSM2049164	MDA	normal	training
GSE77317	GSM2049169	GSM2049171	MDA	normal	training
GSE77317	GSM2049170	GSM2049172	MDA	normal	training
GSE77317	GSM2049174	GSM2049176	MDA	treatment	training
GSE77347	GSM2049892	GSM2049896	MDA	normal	training
GSE77347	GSM2049894	GSM2049898	MDA	normal	training
GSE77347	GSM2049900	GSM2049904	MDA	normal	training
GSE77347	GSM2049902	GSM2049907	MDA	normal	training
GSE77347	GSM2049920	GSM2049921	MDA	normal	training
GSE77347	GSM2049922	GSM2049923	MDA	normal	training
GSE96643	GSM2537143	GSM2537139	MCF	normal	training
GSE96643	GSM2537144	GSM2537140	MCF	normal	training
GSE96643	GSM2537145	GSM2537141	MCF	treatment	training
GSE96643	GSM2537146	GSM2537142	MCF	treatment	training
GSE96714	GSM2538884	GSM2538879	MCF	normal	training
GSE96714	GSM2538886	GSM2538882	MCF	treatment	training
GSE51424	GSM1495244	GSM1495249	brain	normal	training
GSE51424	GSM1495245	GSM1495250	brain	normal	training
GSE51424	GSM1495246	GSM1495251	brain	normal	training
GSE51424	GSM1495247	GSM1495252	brain	normal	training
GSE51424	GSM1495248	GSM1495253	brain	normal	training
GSE48785	GSM1184592	GSM1184591	MM1.S	normal	training
GSE48785	GSM1184594	GSM1184593	MM1.S	treatment	training
GSE48785	GSM1184596	GSM1184595	MM1.S	treatment	training
GSE48785	GSM1184598	GSM1184597	MM1.S	treatment	training
GSE48785	GSM1184600	GSM1184599	MM1.S	treatment	training
GSE48785	GSM1184602	GSM1184601	MM1.S	treatment	training
GSE66809	GSM1632594	GSM1632596	macrophages	normal	training
GSE66809	GSM1632595	GSM1632597	macrophages	treatment	training
GSE66809	GSM1632598	GSM1632600	macrophages	normal	training
GSE66809	GSM1632599	GSM1632601	macrophages	treatment	training
GSE69047	GSM1691202	GSM1691196	MM1.S	treatment	training
GSE69047	GSM1691203	GSM1691197	MM1.S	treatment	training
GSE69047	GSM1691204	GSM1691198	MM1.S	treatment	training
GSE69047	GSM1691205	GSM1691199	MM1.S	treatment	training
GSE69047	GSM1691206	GSM1691200	MM1.S	treatment	training
GSE69047	GSM1691207	GSM1691201	MM1.S	treatment	training
GSE97140	GSM2552191	GSM2552196	HAP-1	treatment	training
GSE97140	GSM2552192	GSM2552197	HAP-1	treatment	training
GSE97140	GSM2552193	GSM2552198	HAP-1	treatment	training
GSE97140	GSM2552194	GSM2552199	HAP-1	normal	training
GSE97140	GSM2552195	GSM2552200	HAP-1	normal	training

## Sheet: genes
Training_set	Test_set
ENSG00000000419.12	ENSG00000123136.14
ENSG00000000460.16	ENSG00000187098.15
ENSG00000000971.15	ENSG00000066583.11
ENSG00000001036.13	ENSG00000136943.10
ENSG00000001084.11	ENSG00000166974.12
ENSG00000001167.14	ENSG00000100266.18
ENSG00000001617.11	ENSG00000175854.11
ENSG00000001629.9	ENSG00000137700.17
ENSG00000001630.15	ENSG00000085563.14
ENSG00000001631.15	ENSG00000103222.18
ENSG00000002330.13	ENSG00000177600.8
ENSG00000002549.12	ENSG00000183011.13
ENSG00000002822.15	ENSG00000158796.16
ENSG00000002834.17	ENSG00000073711.10
ENSG00000002919.14	ENSG00000110344.9
ENSG00000003056.7	ENSG00000085832.16
ENSG00000003137.8	ENSG00000164405.10
ENSG00000003393.14	ENSG00000154065.16
ENSG00000003436.15	ENSG00000180104.15
ENSG00000003509.15	ENSG00000176978.13
ENSG00000003756.16	ENSG00000184985.16
ENSG00000003989.17	ENSG00000162402.13
ENSG00000004059.10	ENSG00000204366.3
ENSG00000004142.11	ENSG00000004766.15
ENSG00000004399.12	ENSG00000134987.11
ENSG00000004455.16	ENSG00000063241.7
ENSG00000004478.7	ENSG00000140479.16
ENSG00000004487.16	ENSG00000070759.16
ENSG00000004534.14	ENSG00000139620.12
ENSG00000004700.15	ENSG00000138750.14
ENSG00000004776.12	ENSG00000123364.4
ENSG00000004779.9	ENSG00000092330.16
ENSG00000004799.7	ENSG00000106785.14
ENSG00000004864.13	ENSG00000105223.19
ENSG00000004897.11	ENSG00000148346.11
ENSG00000004975.11	ENSG00000205544.3
ENSG00000005007.12	ENSG00000123124.13
ENSG00000005020.12	ENSG00000276043.4
ENSG00000005059.15	ENSG00000125375.14
ENSG00000005075.15	ENSG00000185875.12
ENSG00000005156.11	ENSG00000140521.12
ENSG00000005175.9	ENSG00000128335.13
ENSG00000005194.14	ENSG00000137312.14
ENSG00000005243.9	ENSG00000128973.12
ENSG00000005249.12	ENSG00000105983.20
ENSG00000005339.14	ENSG00000070540.12
ENSG00000005436.13	ENSG00000150051.13
ENSG00000005448.16	ENSG00000068885.14
ENSG00000005469.11	ENSG00000198258.10
ENSG00000005483.20	ENSG00000100473.16
ENSG00000005486.16	ENSG00000173065.13
ENSG00000005700.14	ENSG00000169398.19
ENSG00000005801.16	ENSG00000108433.16
ENSG00000005810.17	ENSG00000113658.17
ENSG00000005812.10	ENSG00000130244.12
ENSG00000005882.11	ENSG00000117600.12
ENSG00000005884.17	ENSG00000166321.13
ENSG00000006007.11	ENSG00000182004.12
ENSG00000006015.17	ENSG00000140743.7
ENSG00000006016.10	ENSG00000076513.16
ENSG00000006042.11	ENSG00000142676.13
ENSG00000006062.14	ENSG00000170088.13
ENSG00000006118.14	ENSG00000182327.7
ENSG00000006194.9	ENSG00000144815.15
ENSG00000006210.6	ENSG00000179943.7
ENSG00000006282.20	ENSG00000101193.7
ENSG00000006327.13	ENSG00000255529.7
ENSG00000006451.7	ENSG00000113761.11
ENSG00000006453.13	ENSG00000143569.18
ENSG00000006530.15	ENSG00000087263.16
ENSG00000006625.17	ENSG00000100077.14
ENSG00000006634.7	ENSG00000104368.17
ENSG00000006652.13	ENSG00000153989.7
ENSG00000006695.10	ENSG00000163681.14
ENSG00000006704.10	ENSG00000257727.5
ENSG00000006715.15	ENSG00000170604.4
ENSG00000006744.18	ENSG00000129460.15
ENSG00000006831.9	ENSG00000080802.18
ENSG00000007047.14	ENSG00000108039.17
ENSG00000007062.11	ENSG00000070214.15
ENSG00000007080.10	ENSG00000152620.12
ENSG00000007168.12	ENSG00000189077.10
ENSG00000007202.14	ENSG00000151474.21
ENSG00000007255.10	ENSG00000135709.12
ENSG00000007376.7	ENSG00000141867.17
ENSG00000007392.16	ENSG00000162923.14
ENSG00000007516.13	ENSG00000006712.14
ENSG00000007520.3	ENSG00000275700.4
ENSG00000007944.14	ENSG00000183617.4
ENSG00000008018.8	ENSG00000185947.14
ENSG00000008083.13	ENSG00000134253.9
ENSG00000008130.15	ENSG00000088387.18
ENSG00000008282.8	ENSG00000274750.2
ENSG00000008283.15	ENSG00000137509.10
ENSG00000008294.20	ENSG00000111199.10
ENSG00000008311.14	ENSG00000132824.13
ENSG00000008324.11	ENSG00000135124.14
ENSG00000008382.15	ENSG00000173221.13
ENSG00000008394.12	ENSG00000177283.7
ENSG00000008405.11	ENSG00000171368.11
ENSG00000008441.16	ENSG00000089116.3
ENSG00000008513.14	ENSG00000172171.10
ENSG00000008517.16	ENSG00000149182.14
ENSG00000008838.19	ENSG00000011376.10
ENSG00000008869.11	ENSG00000115112.7
ENSG00000008952.16	ENSG00000178163.7
ENSG00000008988.9	ENSG00000198270.12
ENSG00000009335.17	ENSG00000213672.7
ENSG00000009844.15	ENSG00000141933.9
ENSG00000009954.10	ENSG00000168404.12
ENSG00000010017.12	ENSG00000160207.8
ENSG00000010072.15	ENSG00000164647.8
ENSG00000010165.19	ENSG00000164220.6
ENSG00000010256.10	ENSG00000137513.9
ENSG00000010292.12	ENSG00000107669.17
ENSG00000010322.15	ENSG00000138760.9
ENSG00000010327.10	ENSG00000174469.20
ENSG00000010810.17	ENSG00000144218.18
ENSG00000011007.12	ENSG00000197774.12
ENSG00000011009.10	ENSG00000139636.15
ENSG00000011021.21	ENSG00000122417.15
ENSG00000011028.13	ENSG00000180900.18
ENSG00000011105.12	ENSG00000169862.18
ENSG00000011143.16	ENSG00000100526.19
ENSG00000011198.8	ENSG00000140525.17
ENSG00000011243.17	ENSG00000006125.17
ENSG00000011260.13	ENSG00000163933.9
ENSG00000011295.15	ENSG00000106415.12
ENSG00000011304.19	ENSG00000075975.15
ENSG00000011422.11	ENSG00000163918.10
ENSG00000011426.10	ENSG00000131788.15
ENSG00000011451.18	ENSG00000123395.14
ENSG00000011454.16	ENSG00000100632.10
ENSG00000011465.16	ENSG00000036257.12
ENSG00000011478.11	ENSG00000110092.3
ENSG00000011485.14	ENSG00000177082.12
ENSG00000011638.10	ENSG00000126814.6
ENSG00000012048.21	ENSG00000120693.13
ENSG00000012061.15	ENSG00000166557.12
ENSG00000012171.19	ENSG00000188167.8
ENSG00000012232.8	ENSG00000168575.9
ENSG00000012660.13	ENSG00000186001.13
ENSG00000012822.15	ENSG00000196950.13
ENSG00000012963.14	ENSG00000181873.12
ENSG00000012983.11	ENSG00000091140.13
ENSG00000013016.15	ENSG00000165156.14
ENSG00000013288.8	ENSG00000143409.15
ENSG00000013306.15	ENSG00000119185.12
ENSG00000013364.18	ENSG00000173559.12
ENSG00000013374.16	ENSG00000013503.9
ENSG00000013375.15	ENSG00000181192.11
ENSG00000013392.7	ENSG00000137764.19
ENSG00000013441.15	ENSG00000164626.8
ENSG00000013523.9	ENSG00000133863.8
ENSG00000013561.17	ENSG00000148730.6
ENSG00000013583.8	ENSG00000186897.4
ENSG00000013588.7	ENSG00000123106.10
ENSG00000013810.18	ENSG00000112742.9
ENSG00000014123.9	ENSG00000165813.18
ENSG00000014138.8	ENSG00000161203.13
ENSG00000014164.6	ENSG00000111674.8
ENSG00000014216.15	ENSG00000215305.9
ENSG00000014641.17	ENSG00000144857.14
ENSG00000014824.13	ENSG00000053254.15
ENSG00000014919.12	ENSG00000179091.4
ENSG00000015171.19	ENSG00000004660.14
ENSG00000015475.18	ENSG00000198130.15
ENSG00000015532.9	ENSG00000160584.15
ENSG00000015676.17	ENSG00000168148.3
ENSG00000016864.18	ENSG00000103021.9
ENSG00000017260.19	ENSG00000035862.12
ENSG00000017797.12	ENSG00000148688.13
ENSG00000018236.14	ENSG00000167792.11
ENSG00000018408.14	ENSG00000099992.15
ENSG00000018510.14	ENSG00000126249.7
ENSG00000018625.14	ENSG00000166377.20
ENSG00000018699.11	ENSG00000140691.16
ENSG00000019186.9	ENSG00000186625.13
ENSG00000019549.10	ENSG00000161970.13
ENSG00000019582.14	ENSG00000141956.13
ENSG00000019995.6	ENSG00000272398.5
ENSG00000020129.15	ENSG00000148832.15
ENSG00000020256.19	ENSG00000176438.12
ENSG00000020426.10	ENSG00000161016.17
ENSG00000021355.12	ENSG00000237651.6
ENSG00000021574.12	ENSG00000183765.20
ENSG00000021776.10	ENSG00000104381.12
ENSG00000021826.15	ENSG00000173638.18
ENSG00000022277.12	ENSG00000166855.9
ENSG00000022840.15	ENSG00000160783.19
ENSG00000023041.11	ENSG00000100918.12
ENSG00000023191.16	ENSG00000134294.13
ENSG00000023228.13	ENSG00000117625.13
ENSG00000023287.12	ENSG00000175768.12
ENSG00000023318.7	ENSG00000099899.14
ENSG00000023330.14	ENSG00000164144.15
ENSG00000023516.8	ENSG00000129158.10
ENSG00000023572.9	ENSG00000167815.11
ENSG00000023608.4	ENSG00000107581.12
ENSG00000023697.12	ENSG00000135469.13
ENSG00000023734.10	ENSG00000185808.13
ENSG00000023839.10	ENSG00000172020.12
ENSG00000023902.13	ENSG00000198169.8
ENSG00000023909.9	ENSG00000103051.18
ENSG00000024048.10	ENSG00000169598.15
ENSG00000024422.11	ENSG00000272617.2
ENSG00000024526.16	ENSG00000079263.18
ENSG00000024862.17	ENSG00000080493.15
ENSG00000025039.14	ENSG00000115718.17
ENSG00000025156.12	ENSG00000162520.14
ENSG00000025293.16	ENSG00000132463.13
ENSG00000025708.13	ENSG00000156858.11
ENSG00000025770.18	ENSG00000077147.14
ENSG00000025772.7	ENSG00000089154.10
ENSG00000025796.13	ENSG00000158092.6
ENSG00000025800.13	ENSG00000204922.4
ENSG00000026025.15	ENSG00000065978.18
ENSG00000026103.21	ENSG00000109689.15
ENSG00000026508.18	ENSG00000114200.9
ENSG00000027001.9	ENSG00000255150.2
ENSG00000027697.14	ENSG00000178878.12
ENSG00000027847.13	ENSG00000042088.13
ENSG00000027869.11	ENSG00000105499.13
ENSG00000028116.16	ENSG00000049246.14
ENSG00000028137.18	ENSG00000138448.11
ENSG00000028203.17	ENSG00000144233.9
ENSG00000028310.17	ENSG00000071246.10
ENSG00000028528.14	ENSG00000187790.10
ENSG00000028839.9	ENSG00000151553.14
ENSG00000029363.16	ENSG00000257218.5
ENSG00000029364.11	ENSG00000048028.11
ENSG00000029639.10	ENSG00000006534.15
ENSG00000029725.16	ENSG00000101333.16
ENSG00000030066.13	ENSG00000059769.19
ENSG00000030110.12	ENSG00000184164.14
ENSG00000030582.17	ENSG00000162576.16
ENSG00000031003.10	ENSG00000188493.14
ENSG00000031691.6	ENSG00000112640.14
ENSG00000031698.12	ENSG00000006576.16
ENSG00000031823.14	ENSG00000116161.17
ENSG00000032219.18	ENSG00000089127.12
ENSG00000032389.12	ENSG00000146700.8
ENSG00000033011.11	ENSG00000178307.9
ENSG00000033030.13	ENSG00000158483.15
ENSG00000033100.16	ENSG00000099800.7
ENSG00000033170.16	ENSG00000077097.15
ENSG00000033178.12	ENSG00000164509.13
ENSG00000033627.16	ENSG00000214654.8
ENSG00000033800.13	ENSG00000101452.14
ENSG00000034053.14	ENSG00000162585.16
ENSG00000034510.5	ENSG00000155329.11
ENSG00000034677.12	ENSG00000130734.9
ENSG00000034693.14	ENSG00000183386.9
ENSG00000034713.7	ENSG00000134909.18
ENSG00000035141.7	ENSG00000074410.13
ENSG00000035403.17	ENSG00000145685.13
ENSG00000035499.12	ENSG00000123472.12
ENSG00000035681.7	ENSG00000156304.14
ENSG00000035928.15	ENSG00000105976.14
ENSG00000036054.12	ENSG00000163531.15
ENSG00000036448.9	ENSG00000144724.19
ENSG00000036549.12	ENSG00000197170.9
ENSG00000037241.7	ENSG00000123080.10
ENSG00000037474.14	ENSG00000068001.13
ENSG00000037749.11	ENSG00000198146.4
ENSG00000037757.13	ENSG00000158104.11
ENSG00000037897.16	ENSG00000088247.17
ENSG00000038002.8	ENSG00000013275.7
ENSG00000038219.12	ENSG00000026559.13
ENSG00000038358.14	ENSG00000172500.12
ENSG00000038382.19	ENSG00000131899.10
ENSG00000038427.15	ENSG00000126773.12
ENSG00000039068.18	ENSG00000171314.8
ENSG00000039123.15	ENSG00000152240.12
ENSG00000039319.16	ENSG00000144791.9
ENSG00000039523.19	ENSG00000198951.11
ENSG00000039560.13	ENSG00000169679.14
ENSG00000039650.11	ENSG00000196196.2
ENSG00000040275.16	ENSG00000164855.15
ENSG00000040341.17	ENSG00000101752.11
ENSG00000040487.12	ENSG00000074695.5
ENSG00000040531.14	ENSG00000130396.20
ENSG00000040633.12	ENSG00000047579.19
ENSG00000041357.15	ENSG00000153006.15
ENSG00000041802.10	ENSG00000162409.10
ENSG00000041982.15	ENSG00000006468.13
ENSG00000041988.15	ENSG00000173805.15
ENSG00000042445.13	ENSG00000169515.5
ENSG00000042493.15	ENSG00000156162.16
ENSG00000042753.11	ENSG00000180346.3
ENSG00000043093.13	ENSG00000068724.15
ENSG00000043143.20	ENSG00000135900.3
ENSG00000043355.11	ENSG00000215845.10
ENSG00000043514.15	ENSG00000138439.11
ENSG00000043591.5	ENSG00000145348.16
ENSG00000044090.8	ENSG00000150347.15
ENSG00000044115.20	ENSG00000115267.5
ENSG00000044574.7	ENSG00000215375.6
ENSG00000046604.12	ENSG00000071655.17
ENSG00000047056.14	ENSG00000240065.7
ENSG00000047188.15	ENSG00000105281.12
ENSG00000047315.15	ENSG00000177125.5
ENSG00000047410.13	ENSG00000153904.19
ENSG00000047457.13	ENSG00000173530.5
ENSG00000047621.11	ENSG00000139971.15
ENSG00000047849.21	ENSG00000075426.11
ENSG00000047932.13	ENSG00000158636.16
ENSG00000048162.20	ENSG00000107263.18
ENSG00000048392.11	ENSG00000178607.15
ENSG00000048544.5	ENSG00000148908.14
ENSG00000048649.13	ENSG00000256892.2
ENSG00000048740.18	ENSG00000131876.16
ENSG00000048828.16	ENSG00000146112.11
ENSG00000048991.16	ENSG00000158747.14
ENSG00000049130.15	ENSG00000179455.7
ENSG00000049239.12	ENSG00000108828.15
ENSG00000049245.12	ENSG00000105676.13
ENSG00000049323.15	ENSG00000169418.9
ENSG00000049449.9	ENSG00000166135.13
ENSG00000049540.16	ENSG00000121236.20
ENSG00000049541.10	ENSG00000166128.12
ENSG00000049656.13	ENSG00000125459.14
ENSG00000049759.17	ENSG00000067191.15
ENSG00000049860.13	ENSG00000119718.10
ENSG00000050130.17	ENSG00000133121.20
ENSG00000050165.17	ENSG00000120992.17
ENSG00000050344.8	ENSG00000152926.14
ENSG00000050393.11	ENSG00000204308.7
ENSG00000050405.13	ENSG00000108219.14
ENSG00000050426.15	ENSG00000164597.13
ENSG00000050730.15	ENSG00000100865.14
ENSG00000050820.16	ENSG00000180228.12
ENSG00000051009.10	ENSG00000137601.16
ENSG00000051108.14	ENSG00000122783.16
ENSG00000051128.18	ENSG00000177225.16
ENSG00000051523.10	ENSG00000076351.12
ENSG00000051620.10	ENSG00000124882.3
ENSG00000052126.14	ENSG00000115568.15
ENSG00000052723.11	ENSG00000189007.15
ENSG00000052749.13	ENSG00000137310.11
ENSG00000052802.12	ENSG00000183527.11
ENSG00000052841.14	ENSG00000189171.14
ENSG00000053371.12	ENSG00000103145.10
ENSG00000053372.4	ENSG00000102934.9
ENSG00000053501.12	ENSG00000131069.19
ENSG00000053747.15	ENSG00000197713.14
ENSG00000053900.10	ENSG00000123416.15
ENSG00000054118.13	ENSG00000166340.16
ENSG00000054148.17	ENSG00000118515.11
ENSG00000054267.21	ENSG00000111186.12
ENSG00000054282.15	ENSG00000157881.13
ENSG00000054356.13	ENSG00000106682.14
ENSG00000054523.17	ENSG00000051382.8
ENSG00000054598.7	ENSG00000086848.14
ENSG00000054611.13	ENSG00000261236.7
ENSG00000054965.10	ENSG00000168916.15
ENSG00000055044.10	ENSG00000133466.13
ENSG00000055070.16	ENSG00000087303.17
ENSG00000055130.15	ENSG00000163528.12
ENSG00000055147.18	ENSG00000099282.9
ENSG00000055163.19	ENSG00000113407.13
ENSG00000055208.18	ENSG00000135929.8
ENSG00000055211.12	ENSG00000187123.14
ENSG00000055332.16	ENSG00000084623.11
ENSG00000055483.19	ENSG00000066933.15
ENSG00000055917.15	ENSG00000157613.10
ENSG00000056050.6	ENSG00000175029.16
ENSG00000056097.15	ENSG00000140543.14
ENSG00000056558.10	ENSG00000123144.10
ENSG00000057019.15	ENSG00000113272.13
ENSG00000057252.12	ENSG00000168958.19
ENSG00000057294.14	ENSG00000140836.16
ENSG00000057608.16	ENSG00000117143.13
ENSG00000057657.15	ENSG00000005238.19
ENSG00000057663.15	ENSG00000174574.15
ENSG00000057757.9	ENSG00000113389.15
ENSG00000058056.8	ENSG00000189159.15
ENSG00000058063.15	ENSG00000173588.14
ENSG00000058085.14	ENSG00000204520.12
ENSG00000058091.16	ENSG00000164167.10
ENSG00000058262.9	ENSG00000139644.12
ENSG00000058272.17	ENSG00000159840.15
ENSG00000058600.15	ENSG00000149925.18
ENSG00000058668.14	ENSG00000128203.6
ENSG00000058729.10	ENSG00000164463.12
ENSG00000058799.14	ENSG00000145362.17
ENSG00000058804.11	ENSG00000136770.10
ENSG00000059122.16	ENSG00000085721.12
ENSG00000059378.12	ENSG00000175938.6
ENSG00000059573.8	ENSG00000128694.11
ENSG00000059588.9	ENSG00000103855.17
ENSG00000059728.10	ENSG00000164163.10
ENSG00000059758.7	ENSG00000123983.13
ENSG00000059804.15	ENSG00000132801.6
ENSG00000060069.16	ENSG00000153827.13
ENSG00000060138.12	ENSG00000160087.20
ENSG00000060237.16	ENSG00000172315.5
ENSG00000060339.13	ENSG00000092068.19
ENSG00000060491.16	ENSG00000213965.3
ENSG00000060656.19	ENSG00000115290.9
ENSG00000060688.12	ENSG00000163820.14
ENSG00000060718.21	ENSG00000169689.14
ENSG00000060749.14	ENSG00000071564.14
ENSG00000060762.18	ENSG00000278540.4
ENSG00000060971.17	ENSG00000107554.16
ENSG00000060982.14	ENSG00000153714.5
ENSG00000061273.17	ENSG00000176208.8
ENSG00000061676.14	ENSG00000187634.11
ENSG00000061794.12	ENSG00000136819.15
ENSG00000061918.12	ENSG00000099203.6
ENSG00000061936.9	ENSG00000133706.17
ENSG00000061987.15	ENSG00000093167.17
ENSG00000062194.15	ENSG00000198189.10
ENSG00000062582.13	ENSG00000134905.16
ENSG00000062598.17	ENSG00000146535.13
ENSG00000062650.18	ENSG00000133114.17
ENSG00000062716.12	ENSG00000116871.15
ENSG00000062725.9	ENSG00000100558.8
ENSG00000062822.13	ENSG00000196850.5
ENSG00000063046.17	ENSG00000079805.16
ENSG00000063177.12	ENSG00000162980.16
ENSG00000063180.8	ENSG00000167702.12
ENSG00000063244.12	ENSG00000003987.13
ENSG00000063245.14	ENSG00000198142.4
ENSG00000063322.13	ENSG00000139624.12
ENSG00000063660.8	ENSG00000196218.12
ENSG00000063854.12	ENSG00000166073.10
ENSG00000063978.15	ENSG00000135272.10
ENSG00000064012.21	ENSG00000181315.10
ENSG00000064042.17	ENSG00000138069.16
ENSG00000064102.14	ENSG00000157873.17
ENSG00000064115.10	ENSG00000078369.17
ENSG00000064205.10	ENSG00000188763.4
ENSG00000064313.11	ENSG00000132781.17
ENSG00000064393.15	ENSG00000189164.14
ENSG00000064419.13	ENSG00000136143.15
ENSG00000064490.13	ENSG00000125166.12
ENSG00000064545.14	ENSG00000123091.4
ENSG00000064601.17	ENSG00000119328.11
ENSG00000064607.16	ENSG00000172590.18
ENSG00000064651.13	ENSG00000168393.12
ENSG00000064652.10	ENSG00000104177.17
ENSG00000064666.14	ENSG00000096060.14
ENSG00000064703.11	ENSG00000126217.20
ENSG00000064932.15	ENSG00000179021.9
ENSG00000064933.17	ENSG00000179627.9
ENSG00000064961.18	ENSG00000186638.16
ENSG00000064995.16	ENSG00000177119.15
ENSG00000064999.13	ENSG00000132780.16
ENSG00000065000.16	ENSG00000175066.15
ENSG00000065054.13	ENSG00000134285.10
ENSG00000065057.7	ENSG00000163637.12
ENSG00000065060.16	ENSG00000185189.17
ENSG00000065135.10	ENSG00000239264.8
ENSG00000065150.18	ENSG00000130748.6
ENSG00000065154.11	ENSG00000137054.15
ENSG00000065183.15	ENSG00000205629.11
ENSG00000065243.19	ENSG00000167775.10
ENSG00000065268.10	ENSG00000141540.10
ENSG00000065308.4	ENSG00000132793.11
ENSG00000065320.8	ENSG00000051341.13
ENSG00000065328.16	ENSG00000041880.14
ENSG00000065427.14	ENSG00000073756.11
ENSG00000065457.10	ENSG00000103852.12
ENSG00000065485.19	ENSG00000104419.14
ENSG00000065491.8	ENSG00000018189.12
ENSG00000065518.7	ENSG00000177888.7
ENSG00000065526.10	ENSG00000104951.15
ENSG00000065548.17	ENSG00000171219.8
ENSG00000065559.14	ENSG00000165983.14
ENSG00000065600.12	ENSG00000118363.11
ENSG00000065613.13	ENSG00000137275.13
ENSG00000065618.18	ENSG00000065970.8
ENSG00000065665.20	ENSG00000181915.4
ENSG00000065802.11	ENSG00000156928.4
ENSG00000065809.13	ENSG00000240694.8
ENSG00000065833.8	ENSG00000164070.11
ENSG00000065882.15	ENSG00000136160.15
ENSG00000065911.11	ENSG00000047249.17
ENSG00000066027.11	ENSG00000105443.14
ENSG00000066044.14	ENSG00000096063.15
ENSG00000066117.14	ENSG00000112996.10
ENSG00000066135.12	ENSG00000178409.13
ENSG00000066136.20	ENSG00000154001.13
ENSG00000066248.14	ENSG00000175193.13
ENSG00000066322.14	ENSG00000087494.15
ENSG00000066422.4	ENSG00000198792.12
ENSG00000066455.12	ENSG00000128228.4
ENSG00000066557.5	ENSG00000170144.20
ENSG00000066651.18	ENSG00000168090.9
ENSG00000066654.13	ENSG00000188986.6
ENSG00000066697.14	ENSG00000151491.13
ENSG00000066777.8	ENSG00000165512.4
ENSG00000066855.15	ENSG00000223547.9
ENSG00000066926.10	ENSG00000180626.9
ENSG00000067057.16	ENSG00000085365.17
ENSG00000067064.11	ENSG00000135299.16
ENSG00000067082.14	ENSG00000008735.13
ENSG00000067113.16	ENSG00000176974.19
ENSG00000067141.16	ENSG00000188483.7
ENSG00000067167.7	ENSG00000103194.15
ENSG00000067182.7	ENSG00000134243.11
ENSG00000067208.14	ENSG00000129493.14
ENSG00000067225.17	ENSG00000167588.12
ENSG00000067248.9	ENSG00000107719.8
ENSG00000067334.13	ENSG00000161921.14
ENSG00000067369.13	ENSG00000146386.7
ENSG00000067533.5	ENSG00000168874.12
ENSG00000067560.10	ENSG00000142875.19
ENSG00000067596.10	ENSG00000110031.12
ENSG00000067704.9	ENSG00000108788.11
ENSG00000067715.13	ENSG00000103196.11
ENSG00000067836.12	ENSG00000020922.12
ENSG00000067900.7	ENSG00000182511.11
ENSG00000067955.13	ENSG00000173041.11
ENSG00000068028.17	ENSG00000153234.13
ENSG00000068078.18	ENSG00000007545.15
ENSG00000068097.14	ENSG00000173064.12
ENSG00000068120.14	ENSG00000197375.12
ENSG00000068137.14	ENSG00000158470.5
ENSG00000068305.17	ENSG00000033867.16
ENSG00000068383.18	ENSG00000119231.10
ENSG00000068489.12	ENSG00000189227.5
ENSG00000068650.18	ENSG00000125149.11
ENSG00000068654.15	ENSG00000174238.14
ENSG00000068697.6	ENSG00000166780.10
ENSG00000068745.14	ENSG00000110330.8
ENSG00000068784.12	ENSG00000062038.13
ENSG00000068796.16	ENSG00000183597.15
ENSG00000068878.14	ENSG00000241127.7
ENSG00000068903.19	ENSG00000128564.6
ENSG00000068912.13	ENSG00000118894.14
ENSG00000068971.13	ENSG00000141034.9
ENSG00000068976.13	ENSG00000198168.8
ENSG00000069011.15	ENSG00000128708.12
ENSG00000069248.11	ENSG00000125798.14
ENSG00000069275.12	ENSG00000205643.10
ENSG00000069329.16	ENSG00000249471.7
ENSG00000069345.11	ENSG00000123349.13
ENSG00000069399.14	ENSG00000180257.13
ENSG00000069482.6	ENSG00000197147.13
ENSG00000069702.10	ENSG00000189306.10
ENSG00000069849.10	ENSG00000180979.9
ENSG00000069869.15	ENSG00000115944.14
ENSG00000069956.11	ENSG00000135932.10
ENSG00000069974.15	ENSG00000001561.6
ENSG00000069998.12	ENSG00000189043.9
ENSG00000070010.18	ENSG00000065357.19
ENSG00000070018.8	ENSG00000157954.14
ENSG00000070047.11	ENSG00000185127.6
ENSG00000070061.14	ENSG00000138119.16
ENSG00000070081.16	ENSG00000213064.9
ENSG00000070087.13	ENSG00000162929.13
ENSG00000070366.13	ENSG00000110660.14
ENSG00000070367.15	ENSG00000112182.14
ENSG00000070404.9	ENSG00000103018.16
ENSG00000070413.19	ENSG00000156804.7
ENSG00000070423.17	ENSG00000173480.10
ENSG00000070495.14	ENSG00000159267.14
ENSG00000070610.14	ENSG00000130254.11
ENSG00000070614.14	ENSG00000124177.14
ENSG00000070718.11	ENSG00000144354.13
ENSG00000070761.7	ENSG00000160446.18
ENSG00000070770.8	ENSG00000143621.16
ENSG00000070785.16	ENSG00000005100.12
ENSG00000070814.18	ENSG00000107521.18
ENSG00000070831.15	ENSG00000143179.15
ENSG00000070882.12	ENSG00000010270.13
ENSG00000070950.9	ENSG00000159905.14
ENSG00000070961.15	ENSG00000148429.14
ENSG00000071051.13	ENSG00000102908.20
ENSG00000071054.16	ENSG00000162300.11
ENSG00000071082.10	ENSG00000170234.12
ENSG00000071127.16	ENSG00000080546.13
ENSG00000071243.15	ENSG00000174886.12
ENSG00000071282.11	ENSG00000172667.10
ENSG00000071462.11	ENSG00000213918.10
ENSG00000071537.13	ENSG00000136933.16
ENSG00000071539.13	ENSG00000142627.12
ENSG00000071575.11	ENSG00000157224.15
ENSG00000071626.16	ENSG00000115306.15
ENSG00000071794.15	ENSG00000169217.8
ENSG00000071894.16	ENSG00000170365.9
ENSG00000071967.11	ENSG00000116171.17
ENSG00000071994.10	ENSG00000105426.16
ENSG00000072041.16	ENSG00000129654.7
ENSG00000072042.12	ENSG00000138696.10
ENSG00000072062.13	ENSG00000105325.13
ENSG00000072110.13	ENSG00000090581.9
ENSG00000072134.15	ENSG00000175482.8
ENSG00000072135.12	ENSG00000163913.11
ENSG00000072210.18	ENSG00000144040.12
ENSG00000072274.12	ENSG00000174903.15
ENSG00000072310.16	ENSG00000157107.13
ENSG00000072364.12	ENSG00000068615.18
ENSG00000072401.14	ENSG00000197385.5
ENSG00000072415.8	ENSG00000081791.8
ENSG00000072422.16	ENSG00000152256.13
ENSG00000072571.19	ENSG00000196159.11
ENSG00000072682.18	ENSG00000226742.3
ENSG00000072736.18	ENSG00000074219.13
ENSG00000072756.16	ENSG00000145354.10
ENSG00000072803.17	ENSG00000148400.10
ENSG00000072832.14	ENSG00000066084.12
ENSG00000072849.10	ENSG00000125458.6
ENSG00000072864.14	ENSG00000137944.17
ENSG00000072958.8	ENSG00000130309.10
ENSG00000073008.14	ENSG00000119638.12
ENSG00000073050.11	ENSG00000132205.10
ENSG00000073060.15	ENSG00000006432.15
ENSG00000073111.13	ENSG00000197275.13
ENSG00000073169.13	ENSG00000141401.11
ENSG00000073350.13	ENSG00000124535.15
ENSG00000073536.17	ENSG00000178234.12
ENSG00000073578.16	ENSG00000158985.13
ENSG00000073614.12	ENSG00000158987.20
ENSG00000073712.14	ENSG00000183287.13
ENSG00000073792.15	ENSG00000162736.16
ENSG00000073849.14	ENSG00000146592.16
ENSG00000073921.17	ENSG00000206557.5
ENSG00000073969.18	ENSG00000178996.13
ENSG00000074054.18	ENSG00000144867.11
ENSG00000074071.14	ENSG00000148841.15
ENSG00000074181.8	ENSG00000145743.15
ENSG00000074201.8	ENSG00000091656.15
ENSG00000074266.19	ENSG00000177732.8
ENSG00000074317.10	ENSG00000204469.12
ENSG00000074319.12	ENSG00000106366.8
ENSG00000074356.16	ENSG00000137500.9
ENSG00000074416.13	ENSG00000166913.12
ENSG00000074527.11	ENSG00000127993.15
ENSG00000074582.13	ENSG00000054793.13
ENSG00000074590.13	ENSG00000101680.14
ENSG00000074603.18	ENSG00000105221.16
ENSG00000074696.12	ENSG00000066379.14
ENSG00000074755.14	ENSG00000115561.15
ENSG00000074842.7	ENSG00000182197.10
ENSG00000074855.10	ENSG00000063761.15
ENSG00000075089.9	ENSG00000132359.14
ENSG00000075131.9	ENSG00000266412.5
ENSG00000075142.13	ENSG00000083312.17
ENSG00000075151.20	ENSG00000120451.10
ENSG00000075188.8	ENSG00000163281.11
ENSG00000075213.10	ENSG00000144935.14
ENSG00000075218.18	ENSG00000248487.8
ENSG00000075223.13	ENSG00000119616.11
ENSG00000075234.16	ENSG00000086598.10
ENSG00000075239.13	ENSG00000048140.17
ENSG00000075292.18	ENSG00000155287.10
ENSG00000075336.11	ENSG00000163743.13
ENSG00000075413.17	ENSG00000121481.10
ENSG00000075415.12	ENSG00000137343.17
ENSG00000075420.12	ENSG00000100372.14
ENSG00000075461.5	ENSG00000204568.11
ENSG00000075539.14	ENSG00000011275.18
ENSG00000075568.16	ENSG00000173641.17
ENSG00000075618.17	ENSG00000177663.13
ENSG00000075624.14	ENSG00000134504.13
ENSG00000075643.5	ENSG00000050748.17
ENSG00000075702.17	ENSG00000079999.13
ENSG00000075711.20	ENSG00000115226.9
ENSG00000075785.12	ENSG00000196363.9
ENSG00000075790.10	ENSG00000177542.10
ENSG00000075856.11	ENSG00000203965.12
ENSG00000075914.12	ENSG00000166002.6
ENSG00000075945.12	ENSG00000145331.13
ENSG00000076003.4	ENSG00000182263.13
ENSG00000076043.9	ENSG00000204370.10
ENSG00000076108.11	ENSG00000136942.14
ENSG00000076201.14	ENSG00000145332.13
ENSG00000076242.14	ENSG00000244405.7
ENSG00000076248.10	ENSG00000168275.14
ENSG00000076321.10	ENSG00000204599.14
ENSG00000076356.6	ENSG00000166133.17
ENSG00000076382.16	ENSG00000102878.16
ENSG00000076604.14	ENSG00000127334.10
ENSG00000076650.6	ENSG00000144476.5
ENSG00000076685.18	ENSG00000186063.12
ENSG00000076706.16	ENSG00000169429.10
ENSG00000076826.9	ENSG00000221926.11
ENSG00000076864.19	ENSG00000176907.4
ENSG00000076924.11	ENSG00000121691.4
ENSG00000076928.17	ENSG00000119285.10
ENSG00000076944.15	ENSG00000152894.14
ENSG00000076984.17	ENSG00000169871.12
ENSG00000077044.10	ENSG00000149212.11
ENSG00000077150.18	ENSG00000172845.14
ENSG00000077152.10	ENSG00000099783.11
ENSG00000077232.17	ENSG00000174276.6
ENSG00000077235.17	ENSG00000144136.10
ENSG00000077238.13	ENSG00000113391.18
ENSG00000077254.14	ENSG00000108587.15
ENSG00000077312.8	ENSG00000107882.11
ENSG00000077348.8	ENSG00000105778.18
ENSG00000077380.15	ENSG00000198876.12
ENSG00000077420.15	ENSG00000148634.15
ENSG00000077463.14	ENSG00000100023.18
ENSG00000077514.8	ENSG00000161249.20
ENSG00000077522.12	ENSG00000110367.11
ENSG00000077549.17	ENSG00000145246.13
ENSG00000077585.13	ENSG00000271605.5
ENSG00000077782.19	ENSG00000214706.10
ENSG00000077942.18	ENSG00000062485.18
ENSG00000078018.19	ENSG00000125037.12
ENSG00000078053.16	ENSG00000114026.21
ENSG00000078070.12	ENSG00000171103.10
ENSG00000078140.13	ENSG00000116954.7
ENSG00000078142.12	ENSG00000125848.9
ENSG00000078177.13	ENSG00000109819.8
ENSG00000078237.6	ENSG00000141026.5
ENSG00000078246.16	ENSG00000103356.15
ENSG00000078269.14	ENSG00000157227.12
ENSG00000078304.19	ENSG00000197013.9
ENSG00000078401.6	ENSG00000110801.13
ENSG00000078618.21	ENSG00000166275.15
ENSG00000078668.13	ENSG00000186010.18
ENSG00000078674.17	ENSG00000090006.17
ENSG00000078747.14	ENSG00000083123.14
ENSG00000078804.12	ENSG00000278845.4
ENSG00000078808.16	ENSG00000184508.11
ENSG00000078902.15	ENSG00000136878.12
ENSG00000079134.11	ENSG00000172728.15
ENSG00000079150.17	ENSG00000105085.10
ENSG00000079215.13	ENSG00000068024.16
ENSG00000079246.15	ENSG00000135457.9
ENSG00000079257.7	ENSG00000138246.15
ENSG00000079313.14	ENSG00000158457.5
ENSG00000079332.14	ENSG00000198218.10
ENSG00000079387.13	ENSG00000056736.9
ENSG00000079432.7	ENSG00000064726.9
ENSG00000079459.12	ENSG00000036672.15
ENSG00000079462.7	ENSG00000178814.16
ENSG00000079616.12	ENSG00000182831.11
ENSG00000079691.17	ENSG00000183684.7
ENSG00000079739.15	ENSG00000160404.17
ENSG00000079785.14	ENSG00000105355.8
ENSG00000079819.18	ENSG00000109705.7
ENSG00000079931.14	ENSG00000204634.12
ENSG00000079950.13	ENSG00000222011.8
ENSG00000080189.14	ENSG00000114030.12
ENSG00000080200.9	ENSG00000166532.15
ENSG00000080345.17	ENSG00000116663.10
ENSG00000080371.5	ENSG00000011132.11
ENSG00000080503.23	ENSG00000182768.8
ENSG00000080608.9	ENSG00000166925.8
ENSG00000080815.18	ENSG00000110675.12
ENSG00000080819.6	ENSG00000101057.15
ENSG00000080822.16	ENSG00000264364.2
ENSG00000080839.11	ENSG00000124783.12
ENSG00000080845.17	ENSG00000185359.12
ENSG00000080986.12	ENSG00000110218.8
ENSG00000081019.13	ENSG00000156876.9
ENSG00000081041.8	ENSG00000170270.4
ENSG00000081051.7	ENSG00000128159.11
ENSG00000081087.14	ENSG00000157540.20
ENSG00000081154.11	ENSG00000160688.18
ENSG00000081177.18	ENSG00000118292.8
ENSG00000081307.12	ENSG00000148362.10
ENSG00000081320.10	ENSG00000155380.11
ENSG00000081721.11	ENSG00000153391.15
ENSG00000081760.16	ENSG00000156787.16
ENSG00000081803.15	ENSG00000162104.9
ENSG00000081870.11	ENSG00000170961.6
ENSG00000081913.13	ENSG00000167595.15
ENSG00000082014.16	ENSG00000141504.11
ENSG00000082068.8	ENSG00000011405.13
ENSG00000082153.17	ENSG00000109971.13
ENSG00000082212.12	ENSG00000114573.9
ENSG00000082213.17	ENSG00000257704.3
ENSG00000082397.17	ENSG00000107262.20
ENSG00000082515.17	ENSG00000164506.14
ENSG00000082516.8	ENSG00000168016.14
ENSG00000082641.15	ENSG00000109861.15
ENSG00000082684.14	ENSG00000116406.18
ENSG00000082701.14	ENSG00000067365.14
ENSG00000082781.11	ENSG00000113657.12
ENSG00000082805.19	ENSG00000128965.11
ENSG00000082898.16	ENSG00000130340.15
ENSG00000082996.19	ENSG00000239672.7
ENSG00000083093.9	ENSG00000109686.17
ENSG00000083168.9	ENSG00000163382.11
ENSG00000083223.17	ENSG00000107282.7
ENSG00000083444.16	ENSG00000168497.4
ENSG00000083457.11	ENSG00000170473.16
ENSG00000083520.14	ENSG00000065675.14
ENSG00000083535.15	ENSG00000031081.10
ENSG00000083635.7	ENSG00000128510.10
ENSG00000083720.12	ENSG00000072778.19
ENSG00000083845.8	ENSG00000124641.15
ENSG00000083857.13	ENSG00000100116.16
ENSG00000083896.12	ENSG00000185567.6
ENSG00000083937.8	ENSG00000176399.3
ENSG00000084070.11	ENSG00000100883.11
ENSG00000084072.16	ENSG00000126602.10
ENSG00000084073.8	ENSG00000128524.4
ENSG00000084090.13	ENSG00000122257.19
ENSG00000084092.6	ENSG00000090020.10
ENSG00000084093.16	ENSG00000147509.13
ENSG00000084207.16	ENSG00000167601.11
ENSG00000084234.16	ENSG00000168246.5
ENSG00000084444.13	ENSG00000125319.14
ENSG00000084463.7	ENSG00000149930.17
ENSG00000084636.17	ENSG00000184060.10
ENSG00000084652.15	ENSG00000133983.14
ENSG00000084676.15	ENSG00000134759.13
ENSG00000084693.15	ENSG00000275023.4
ENSG00000084731.14	ENSG00000159063.12
ENSG00000084733.10	ENSG00000086065.13
ENSG00000084754.11	ENSG00000176731.11
ENSG00000084764.10	ENSG00000142173.14
ENSG00000084774.13	ENSG00000166908.17
ENSG00000085117.11	ENSG00000184983.9
ENSG00000085231.13	ENSG00000115998.7
ENSG00000085274.15	ENSG00000111678.10
ENSG00000085377.13	ENSG00000100997.18
ENSG00000085433.15	ENSG00000105372.7
ENSG00000085449.14	ENSG00000068079.7
ENSG00000085491.15	ENSG00000166529.14
ENSG00000085511.19	ENSG00000139437.17
ENSG00000085514.15	ENSG00000183779.6
ENSG00000085662.13	ENSG00000010278.13
ENSG00000085719.12	ENSG00000186166.8
ENSG00000085733.15	ENSG00000129933.20
ENSG00000085760.14	ENSG00000154856.12
ENSG00000085840.12	ENSG00000137449.15
ENSG00000085871.8	ENSG00000095002.14
ENSG00000085872.14	ENSG00000118816.9
ENSG00000085978.21	ENSG00000175445.14
ENSG00000085998.13	ENSG00000070756.15
ENSG00000085999.11	ENSG00000107960.10
ENSG00000086015.20	ENSG00000206560.11
ENSG00000086061.15	ENSG00000167553.15
ENSG00000086062.12	ENSG00000041353.9
ENSG00000086102.18	ENSG00000168028.13
ENSG00000086189.9	ENSG00000184470.20
ENSG00000086200.16	ENSG00000135596.17
ENSG00000086232.12	ENSG00000108448.21
ENSG00000086289.11	ENSG00000189144.13
ENSG00000086300.15	ENSG00000174891.12
ENSG00000086475.14	ENSG00000154114.12
ENSG00000086504.15	ENSG00000163257.10
ENSG00000086544.2	ENSG00000179456.10
ENSG00000086589.11	ENSG00000153975.9
ENSG00000086827.8	ENSG00000198839.9
ENSG00000087008.15	ENSG00000188315.7
ENSG00000087053.18	ENSG00000186806.5
ENSG00000087074.7	ENSG00000184916.8
ENSG00000087076.8	ENSG00000134313.15
ENSG00000087077.13	ENSG00000130811.11
ENSG00000087085.14	ENSG00000198862.13
ENSG00000087086.14	ENSG00000179292.4
ENSG00000087087.19	ENSG00000021762.19
ENSG00000087088.19	ENSG00000231767.4
ENSG00000087111.20	ENSG00000168918.13
ENSG00000087152.15	ENSG00000103024.7
ENSG00000087157.18	ENSG00000133678.13
ENSG00000087191.12	ENSG00000167861.15
ENSG00000087206.16	ENSG00000069966.18
ENSG00000087245.12	ENSG00000196586.13
ENSG00000087258.14	ENSG00000180035.12
ENSG00000087269.15	ENSG00000141404.15
ENSG00000087274.16	ENSG00000127511.9
ENSG00000087301.8	ENSG00000177565.16
ENSG00000087302.8	ENSG00000176834.13
ENSG00000087365.15	ENSG00000100314.3
ENSG00000087448.9	ENSG00000105136.20
ENSG00000087460.24	ENSG00000136450.12
ENSG00000087470.17	ENSG00000136147.17
ENSG00000087502.17	ENSG00000032444.16
ENSG00000087510.6	ENSG00000065609.14
ENSG00000087586.17	ENSG00000198793.12
ENSG00000087884.14	ENSG00000171174.14
ENSG00000087995.15	ENSG00000118690.12
ENSG00000088038.18	ENSG00000055950.16
ENSG00000088205.12	ENSG00000090661.11
ENSG00000088256.8	ENSG00000120278.16
ENSG00000088280.18	ENSG00000127337.6
ENSG00000088298.12	ENSG00000140650.11
ENSG00000088305.18	ENSG00000126777.17
ENSG00000088325.15	ENSG00000196730.12
ENSG00000088356.5	ENSG00000133112.16
ENSG00000088367.21	ENSG00000074800.14
ENSG00000088448.14	ENSG00000185920.15
ENSG00000088451.10	ENSG00000134901.12
ENSG00000088682.13	ENSG00000142046.14
ENSG00000088766.11	ENSG00000177051.5
ENSG00000088812.17	ENSG00000137404.14
ENSG00000088826.17	ENSG00000171224.8
ENSG00000088832.16	ENSG00000157326.18
ENSG00000088833.17	ENSG00000167395.10
ENSG00000088836.13	ENSG00000184863.10
ENSG00000088888.17	ENSG00000162734.12
ENSG00000088899.15	ENSG00000066279.17
ENSG00000088930.7	ENSG00000132004.12
ENSG00000088986.10	ENSG00000125285.5
ENSG00000088992.17	ENSG00000100280.16
ENSG00000089006.16	ENSG00000179988.14
ENSG00000089009.15	ENSG00000122550.17
ENSG00000089041.16	ENSG00000135482.6
ENSG00000089050.15	ENSG00000035687.9
ENSG00000089053.12	ENSG00000226887.7
ENSG00000089057.14	ENSG00000204344.14
ENSG00000089060.11	ENSG00000213699.8
ENSG00000089063.14	ENSG00000127481.14
ENSG00000089157.15	ENSG00000188372.14
ENSG00000089159.16	ENSG00000162144.9
ENSG00000089195.14	ENSG00000147804.9
ENSG00000089199.9	ENSG00000038274.16
ENSG00000089220.4	ENSG00000139946.9
ENSG00000089234.15	ENSG00000147889.17
ENSG00000089280.18	ENSG00000168439.16
ENSG00000089327.14	ENSG00000138035.14
ENSG00000089351.14	ENSG00000148450.12
ENSG00000089486.16	ENSG00000135926.14
ENSG00000089597.16	ENSG00000142528.15
ENSG00000089639.10	ENSG00000122406.13
ENSG00000089685.14	ENSG00000100554.11
ENSG00000089693.10	ENSG00000164654.15
ENSG00000089737.16	ENSG00000126267.8
ENSG00000089876.11	ENSG00000106789.12
ENSG00000089902.9	ENSG00000177432.7
ENSG00000090013.10	ENSG00000121940.15
ENSG00000090054.14	ENSG00000100084.14
ENSG00000090060.17	ENSG00000162512.15
ENSG00000090061.17	ENSG00000070476.14
ENSG00000090097.21	ENSG00000143590.13
ENSG00000090238.11	ENSG00000007341.18
ENSG00000090263.15	ENSG00000163069.12
ENSG00000090266.12	ENSG00000070501.11
ENSG00000090273.13	ENSG00000140297.12
ENSG00000090316.15	ENSG00000166887.15
ENSG00000090339.8	ENSG00000259494.1
ENSG00000090372.14	ENSG00000197763.14
ENSG00000090432.6	ENSG00000179476.7
ENSG00000090447.11	ENSG00000164327.12
ENSG00000090470.14	ENSG00000072786.12
ENSG00000090487.10	ENSG00000136238.17
ENSG00000090520.11	ENSG00000127720.7
ENSG00000090530.9	ENSG00000115425.13
ENSG00000090565.15	ENSG00000180776.15
ENSG00000090615.14	ENSG00000048405.9
ENSG00000090621.13	ENSG00000164638.10
ENSG00000090674.15	ENSG00000086666.18
ENSG00000090686.15	ENSG00000164022.16
ENSG00000090861.15	ENSG00000176058.12
ENSG00000090863.11	ENSG00000165832.5
ENSG00000090905.18	ENSG00000149480.6
ENSG00000090924.14	ENSG00000123297.17
ENSG00000090932.10	ENSG00000137135.17
ENSG00000090971.4	ENSG00000168306.12
ENSG00000090989.17	ENSG00000113140.10
ENSG00000091039.16	ENSG00000142687.17
ENSG00000091127.13	ENSG00000085415.15
ENSG00000091129.19	ENSG00000149262.16
ENSG00000091136.13	ENSG00000123374.10
ENSG00000091164.12	ENSG00000161040.16
ENSG00000091317.7	ENSG00000120686.11
ENSG00000091409.14	ENSG00000128591.15
ENSG00000091436.16	ENSG00000124784.8
ENSG00000091483.6	ENSG00000105538.9
ENSG00000091490.10	ENSG00000141551.14
ENSG00000091513.15	ENSG00000125450.10
ENSG00000091527.15	ENSG00000198912.10
ENSG00000091542.8	ENSG00000105726.16
ENSG00000091592.15	ENSG00000092931.11
ENSG00000091640.7	ENSG00000139496.15
ENSG00000091651.8	ENSG00000010361.13
ENSG00000091732.15	ENSG00000158715.5
ENSG00000091831.23	ENSG00000115677.16
ENSG00000091947.9	ENSG00000181031.15
ENSG00000091986.15	ENSG00000125656.9
ENSG00000092010.14	ENSG00000123191.14
ENSG00000092020.10	ENSG00000072071.16
ENSG00000092036.18	ENSG00000081181.7
ENSG00000092094.10	ENSG00000124762.13
ENSG00000092096.16	ENSG00000054116.11
ENSG00000092098.16	ENSG00000007384.15
ENSG00000092108.20	ENSG00000179399.14
ENSG00000092140.14	ENSG00000142731.10
ENSG00000092148.12	ENSG00000198466.11
ENSG00000092199.17	ENSG00000113615.12
ENSG00000092201.9	ENSG00000139163.15
ENSG00000092203.13	ENSG00000179242.15
ENSG00000092208.16	ENSG00000170396.7
ENSG00000092439.14	ENSG00000151240.16
ENSG00000092470.11	ENSG00000170955.9
ENSG00000092531.9	ENSG00000142507.9
ENSG00000092621.12	ENSG00000172939.8
ENSG00000092758.16	ENSG00000081923.12
ENSG00000092820.17	ENSG00000007923.15
ENSG00000092841.18	ENSG00000180953.11
ENSG00000092847.11	ENSG00000130764.9
ENSG00000092853.13	ENSG00000011566.14
ENSG00000092929.11	ENSG00000128789.20
ENSG00000092964.17	ENSG00000138592.13
ENSG00000092969.11	ENSG00000105825.11
ENSG00000092978.10	ENSG00000174917.8
ENSG00000093009.9	ENSG00000251369.8
ENSG00000093010.13	ENSG00000204681.10
ENSG00000093144.18	ENSG00000134698.10
ENSG00000093183.13	ENSG00000188827.10
ENSG00000093217.9	ENSG00000164414.17
ENSG00000094804.9	ENSG00000101605.12
ENSG00000094880.10	ENSG00000273899.4
ENSG00000094914.12	ENSG00000169410.9
ENSG00000094916.15	ENSG00000198690.9
ENSG00000094975.13	ENSG00000077684.15
ENSG00000095015.5	ENSG00000157036.12
ENSG00000095059.15	ENSG00000100523.14
ENSG00000095066.11	ENSG00000169860.6
ENSG00000095139.13	ENSG00000140678.16
ENSG00000095209.11	ENSG00000120896.13
ENSG00000095261.13	ENSG00000198356.11
ENSG00000095303.15	ENSG00000198000.11
ENSG00000095319.14	ENSG00000134809.8
ENSG00000095321.16	ENSG00000196504.15
ENSG00000095380.10	ENSG00000198440.9
ENSG00000095383.19	ENSG00000182901.16
ENSG00000095485.17	ENSG00000108883.12
ENSG00000095564.13	ENSG00000010626.14
ENSG00000095739.10	ENSG00000004866.20
ENSG00000095752.6	ENSG00000151458.11
ENSG00000095787.21	ENSG00000179632.9
ENSG00000095794.19	ENSG00000164181.13
ENSG00000095906.16	ENSG00000099889.13
ENSG00000096070.19	ENSG00000170458.13
ENSG00000096080.11	ENSG00000148516.21
ENSG00000096092.5	ENSG00000131236.16
ENSG00000096384.19	ENSG00000022976.15
ENSG00000096401.7	ENSG00000105607.12
ENSG00000096433.10	ENSG00000113205.5
ENSG00000096654.15	ENSG00000157557.11
ENSG00000096696.13	ENSG00000130204.12
ENSG00000096717.11	ENSG00000123427.16
ENSG00000096746.17	ENSG00000010244.18
ENSG00000096872.15	ENSG00000119711.12
ENSG00000097007.17	ENSG00000172765.16
ENSG00000097021.19	ENSG00000144026.11
ENSG00000097033.14	ENSG00000140320.11
ENSG00000097046.12	ENSG00000065361.15
ENSG00000099194.5	ENSG00000250479.8
ENSG00000099204.18	ENSG00000198542.13
ENSG00000099219.13	ENSG00000166035.10
ENSG00000099246.16	ENSG00000168438.14
ENSG00000099250.17	ENSG00000143443.9
ENSG00000099256.18	ENSG00000105376.4
ENSG00000099284.13	ENSG00000197343.10
ENSG00000099290.16	ENSG00000080824.18
ENSG00000099308.10	ENSG00000162545.5
ENSG00000099330.8	ENSG00000154153.13
ENSG00000099331.13	ENSG00000157064.10
ENSG00000099341.11	ENSG00000110427.15
ENSG00000099364.16	ENSG00000164088.17
ENSG00000099365.10	ENSG00000137955.15
ENSG00000099381.17	ENSG00000117868.15
ENSG00000099385.11	ENSG00000067066.16
ENSG00000099617.3	ENSG00000213079.9
ENSG00000099622.13	ENSG00000113845.9
ENSG00000099624.7	ENSG00000205426.10
ENSG00000099625.12	ENSG00000060642.10
ENSG00000099785.10	ENSG00000153993.13
ENSG00000099795.6	ENSG00000160932.10
ENSG00000099797.14	ENSG00000229117.8
ENSG00000099804.8	ENSG00000170417.15
ENSG00000099812.8	ENSG00000009307.15
ENSG00000099814.15	ENSG00000088035.15
ENSG00000099817.11	ENSG00000165895.18
ENSG00000099821.13	ENSG00000116675.15
ENSG00000099822.2	ENSG00000124193.14
ENSG00000099849.14	ENSG00000130584.10
ENSG00000099860.8	ENSG00000132535.18
ENSG00000099864.17	ENSG00000102984.14
ENSG00000099875.14	ENSG00000133321.10
ENSG00000099901.16	ENSG00000136158.11
ENSG00000099904.15	ENSG00000165660.7
ENSG00000099910.16	ENSG00000236287.7
ENSG00000099917.17	ENSG00000179562.2
ENSG00000099937.10	ENSG00000081479.12
ENSG00000099940.11	ENSG00000105329.9
ENSG00000099942.12	ENSG00000163686.14
ENSG00000099956.19	ENSG00000133101.9
ENSG00000099968.17	ENSG00000166477.12
ENSG00000099991.17	ENSG00000198039.11
ENSG00000099994.10	ENSG00000158270.11
ENSG00000099995.18	ENSG00000106853.18
ENSG00000100028.11	ENSG00000173404.4
ENSG00000100029.17	ENSG00000196517.11
ENSG00000100030.14	ENSG00000083642.18
ENSG00000100031.18	ENSG00000140688.16
ENSG00000100056.11	ENSG00000109917.10
ENSG00000100065.14	ENSG00000144228.8
ENSG00000100075.9	ENSG00000169750.8
ENSG00000100083.18	ENSG00000160233.7
ENSG00000100095.18	ENSG00000107959.15
ENSG00000100097.11	ENSG00000163607.15
ENSG00000100099.20	ENSG00000179841.8
ENSG00000100100.12	ENSG00000184009.10
ENSG00000100104.13	ENSG00000089248.6
ENSG00000100106.20	ENSG00000163874.10
ENSG00000100109.16	ENSG00000171428.13
ENSG00000100124.14	ENSG00000187955.11
ENSG00000100129.17	ENSG00000168824.14
ENSG00000100138.13	ENSG00000114857.17
ENSG00000100139.13	ENSG00000185842.15
ENSG00000100142.14	ENSG00000115738.9
ENSG00000100147.13	ENSG00000172336.4
ENSG00000100151.15	ENSG00000112308.12
ENSG00000100162.14	ENSG00000110881.11
ENSG00000100167.20	ENSG00000170860.3
ENSG00000100196.10	ENSG00000213445.9
ENSG00000100201.20	ENSG00000123607.14
ENSG00000100207.18	ENSG00000117010.15
ENSG00000100209.9	ENSG00000196739.14
ENSG00000100211.10	ENSG00000107816.17
ENSG00000100216.5	ENSG00000054983.16
ENSG00000100219.16	ENSG00000104907.12
ENSG00000100220.11	ENSG00000115109.13
ENSG00000100221.10	ENSG00000168772.10
ENSG00000100225.17	ENSG00000089048.14
ENSG00000100226.15	ENSG00000168505.6
ENSG00000100228.12	ENSG00000110719.9
ENSG00000100234.11	ENSG00000165490.12
ENSG00000100239.15	ENSG00000136159.3
ENSG00000100241.20	ENSG00000143376.13
ENSG00000100242.15	ENSG00000204954.9
ENSG00000100243.20	ENSG00000105829.11
ENSG00000100246.12	ENSG00000107104.18
ENSG00000100258.17	ENSG00000197747.8
ENSG00000100263.13	ENSG00000130758.7
ENSG00000100271.16	ENSG00000154781.15
ENSG00000100281.13	ENSG00000118432.12
ENSG00000100284.20	ENSG00000137177.19
ENSG00000100290.2	ENSG00000007866.19
ENSG00000100292.16	ENSG00000008256.15
ENSG00000100294.12	ENSG00000136213.9
ENSG00000100296.13	ENSG00000057935.13
ENSG00000100297.15	ENSG00000108691.9
ENSG00000100299.17	ENSG00000186834.3
ENSG00000100300.17	ENSG00000232838.3
ENSG00000100304.12	ENSG00000105669.13
ENSG00000100316.15	ENSG00000152767.16
ENSG00000100319.12	ENSG00000146826.16
ENSG00000100320.22	ENSG00000152904.11
ENSG00000100321.14	ENSG00000042286.14
ENSG00000100324.13	ENSG00000111684.10
ENSG00000100325.14	ENSG00000072518.20
ENSG00000100335.14	ENSG00000171813.13
ENSG00000100342.20	ENSG00000126391.13
ENSG00000100344.10	ENSG00000128573.24
ENSG00000100345.21	ENSG00000182957.15
ENSG00000100347.14	ENSG00000034152.18
ENSG00000100348.9	ENSG00000203722.7
ENSG00000100350.14	ENSG00000104957.13
ENSG00000100353.17	ENSG00000111726.12
ENSG00000100354.20	ENSG00000276368.1
ENSG00000100360.14	ENSG00000170265.11
ENSG00000100364.18	ENSG00000148396.18
ENSG00000100379.17	ENSG00000106546.13
ENSG00000100380.13	ENSG00000160285.14
ENSG00000100387.8	ENSG00000244509.3
ENSG00000100393.12	ENSG00000180098.9
ENSG00000100395.14	ENSG00000008300.16
ENSG00000100401.19	ENSG00000112773.15
ENSG00000100403.11	ENSG00000104365.13
ENSG00000100410.7	ENSG00000166199.12
ENSG00000100412.15	ENSG00000074047.21
ENSG00000100413.16	ENSG00000254087.7
ENSG00000100416.13	ENSG00000100227.17
ENSG00000100417.11	ENSG00000100105.17
ENSG00000100418.7	ENSG00000185453.12
ENSG00000100422.13	ENSG00000121067.17
ENSG00000100425.18	ENSG00000112304.10
ENSG00000100426.6	ENSG00000083844.10
ENSG00000100427.15
ENSG00000100439.10
ENSG00000100442.10
ENSG00000100445.17
ENSG00000100461.17
ENSG00000100462.15
ENSG00000100479.12
ENSG00000100483.13
ENSG00000100503.23
ENSG00000100504.16
ENSG00000100519.11
ENSG00000100522.8
ENSG00000100528.11
ENSG00000100532.11
ENSG00000100564.8
ENSG00000100567.12
ENSG00000100568.10
ENSG00000100575.13
ENSG00000100577.18
ENSG00000100578.14
ENSG00000100591.7
ENSG00000100592.15
ENSG00000100596.6
ENSG00000100600.14
ENSG00000100601.9
ENSG00000100603.13
ENSG00000100605.16
ENSG00000100612.13
ENSG00000100614.17
ENSG00000100625.8
ENSG00000100644.16
ENSG00000100647.7
ENSG00000100650.15
ENSG00000100664.10
ENSG00000100697.14
ENSG00000100711.13
ENSG00000100714.15
ENSG00000100722.18
ENSG00000100726.14
ENSG00000100731.15
ENSG00000100744.14
ENSG00000100749.7
ENSG00000100764.13
ENSG00000100796.17
ENSG00000100804.18
ENSG00000100811.12
ENSG00000100813.14
ENSG00000100814.17
ENSG00000100815.12
ENSG00000100823.11
ENSG00000100836.10
ENSG00000100852.12
ENSG00000100867.14
ENSG00000100888.13
ENSG00000100889.11
ENSG00000100897.17
ENSG00000100902.10
ENSG00000100906.10
ENSG00000100908.13
ENSG00000100911.15
ENSG00000100916.13
ENSG00000100934.14
ENSG00000100938.17
ENSG00000100941.8
ENSG00000100949.14
ENSG00000100979.14
ENSG00000100982.11
ENSG00000100983.10
ENSG00000100985.7
ENSG00000100991.11
ENSG00000100994.11
ENSG00000101000.5
ENSG00000101003.9
ENSG00000101017.13
ENSG00000101019.21
ENSG00000101040.19
ENSG00000101052.12
ENSG00000101079.20
ENSG00000101084.17
ENSG00000101109.11
ENSG00000101126.16
ENSG00000101132.9
ENSG00000101138.11
ENSG00000101146.12
ENSG00000101150.17
ENSG00000101152.10
ENSG00000101158.13
ENSG00000101160.13
ENSG00000101161.7
ENSG00000101166.15
ENSG00000101181.17
ENSG00000101182.14
ENSG00000101187.15
ENSG00000101189.6
ENSG00000101191.16
ENSG00000101194.17
ENSG00000101199.12
ENSG00000101210.11
ENSG00000101216.10
ENSG00000101220.17
ENSG00000101224.17
ENSG00000101246.19
ENSG00000101255.10
ENSG00000101290.13
ENSG00000101294.16
ENSG00000101310.15
ENSG00000101311.15
ENSG00000101335.9
ENSG00000101337.15
ENSG00000101343.14
ENSG00000101346.13
ENSG00000101347.9
ENSG00000101350.7
ENSG00000101361.16
ENSG00000101363.12
ENSG00000101365.20
ENSG00000101367.8
ENSG00000101384.12
ENSG00000101391.20
ENSG00000101400.5
ENSG00000101407.12
ENSG00000101412.12
ENSG00000101413.11
ENSG00000101421.3
ENSG00000101439.8
ENSG00000101442.9
ENSG00000101444.12
ENSG00000101447.14
ENSG00000101457.12
ENSG00000101460.12
ENSG00000101464.10
ENSG00000101470.9
ENSG00000101473.16
ENSG00000101474.11
ENSG00000101544.8
ENSG00000101546.12
ENSG00000101557.14
ENSG00000101558.13
ENSG00000101577.9
ENSG00000101596.15
ENSG00000101608.12
ENSG00000101624.10
ENSG00000101639.18
ENSG00000101654.17
ENSG00000101745.16
ENSG00000101773.18
ENSG00000101782.14
ENSG00000102189.16
ENSG00000102471.13
ENSG00000102531.16
ENSG00000102554.13
ENSG00000102572.14
ENSG00000102575.10
ENSG00000102580.14
ENSG00000102595.19
ENSG00000102606.18
ENSG00000102699.5
ENSG00000102710.19
ENSG00000102738.7
ENSG00000102743.14
ENSG00000102753.9
ENSG00000102760.12
ENSG00000102763.17
ENSG00000102781.13
ENSG00000102804.14
ENSG00000102854.15
ENSG00000102858.12
ENSG00000102870.5
ENSG00000102871.15
ENSG00000102879.15
ENSG00000102882.11
ENSG00000102893.15
ENSG00000102897.9
ENSG00000102898.11
ENSG00000102900.12
ENSG00000102901.12
ENSG00000102910.13
ENSG00000102921.7
ENSG00000102931.7
ENSG00000102974.15
ENSG00000102977.13
ENSG00000102978.12
ENSG00000102996.4
ENSG00000103005.11
ENSG00000103034.14
ENSG00000103035.10
ENSG00000103042.8
ENSG00000103043.14
ENSG00000103047.7
ENSG00000103061.12
ENSG00000103064.13
ENSG00000103066.12
ENSG00000103067.13
ENSG00000103091.14
ENSG00000103111.14
ENSG00000103121.8
ENSG00000103148.15
ENSG00000103152.11
ENSG00000103154.9
ENSG00000103160.11
ENSG00000103168.16
ENSG00000103174.11
ENSG00000103187.7
ENSG00000103197.17
ENSG00000103202.12
ENSG00000103249.17
ENSG00000103253.17
ENSG00000103254.9
ENSG00000103257.8
ENSG00000103260.8
ENSG00000103266.10
ENSG00000103274.10
ENSG00000103275.19
ENSG00000103316.10
ENSG00000103319.11
ENSG00000103326.11
ENSG00000103335.22
ENSG00000103342.12
ENSG00000103343.12
ENSG00000103353.15
ENSG00000103363.14
ENSG00000103365.15
ENSG00000103381.11
ENSG00000103415.11
ENSG00000103423.13
ENSG00000103429.10
ENSG00000103449.11
ENSG00000103479.15
ENSG00000103485.17
ENSG00000103495.13
ENSG00000103496.14
ENSG00000103502.13
ENSG00000103507.13
ENSG00000103510.19
ENSG00000103512.14
ENSG00000103544.14
ENSG00000103549.21
ENSG00000103591.12
ENSG00000103642.11
ENSG00000103647.12
ENSG00000103653.16
ENSG00000103657.13
ENSG00000103671.9
ENSG00000103707.9
ENSG00000103769.9
ENSG00000103811.15
ENSG00000103876.12
ENSG00000103888.16
ENSG00000103932.11
ENSG00000103966.10
ENSG00000103978.15
ENSG00000103994.16
ENSG00000103995.13
ENSG00000104064.17
ENSG00000104067.16
ENSG00000104093.13
ENSG00000104131.12
ENSG00000104133.14
ENSG00000104140.6
ENSG00000104142.10
ENSG00000104147.8
ENSG00000104213.12
ENSG00000104219.12
ENSG00000104221.12
ENSG00000104228.12
ENSG00000104231.10
ENSG00000104267.9
ENSG00000104299.14
ENSG00000104312.7
ENSG00000104320.13
ENSG00000104324.15
ENSG00000104325.6
ENSG00000104331.8
ENSG00000104332.11
ENSG00000104341.16
ENSG00000104356.10
ENSG00000104388.14
ENSG00000104408.9
ENSG00000104412.7
ENSG00000104427.11
ENSG00000104442.9
ENSG00000104450.12
ENSG00000104472.9
ENSG00000104490.17
ENSG00000104517.12
ENSG00000104518.10
ENSG00000104522.15
ENSG00000104524.13
ENSG00000104529.17
ENSG00000104549.11
ENSG00000104611.11
ENSG00000104613.11
ENSG00000104626.14
ENSG00000104635.13
ENSG00000104660.17
ENSG00000104671.7
ENSG00000104679.10
ENSG00000104687.13
ENSG00000104689.9
ENSG00000104691.14
ENSG00000104695.12
ENSG00000104723.20
ENSG00000104731.13
ENSG00000104738.16
ENSG00000104763.18
ENSG00000104765.15
ENSG00000104774.12
ENSG00000104783.11
ENSG00000104805.15
ENSG00000104812.14
ENSG00000104823.8
ENSG00000104824.16
ENSG00000104825.16
ENSG00000104833.11
ENSG00000104852.14
ENSG00000104853.15
ENSG00000104856.13
ENSG00000104859.14
ENSG00000104863.11
ENSG00000104866.10
ENSG00000104870.12
ENSG00000104872.10
ENSG00000104881.15
ENSG00000104884.15
ENSG00000104885.17
ENSG00000104886.11
ENSG00000104897.9
ENSG00000104904.12
ENSG00000104915.14
ENSG00000104946.12
ENSG00000104960.15
ENSG00000104964.14
ENSG00000104969.9
ENSG00000104973.17
ENSG00000104976.11
ENSG00000104979.8
ENSG00000104980.7
ENSG00000104983.8
ENSG00000104998.3
ENSG00000105011.8
ENSG00000105048.16
ENSG00000105058.11
ENSG00000105063.18
ENSG00000105088.8
ENSG00000105127.8
ENSG00000105135.15
ENSG00000105137.12
ENSG00000105171.9
ENSG00000105173.13
ENSG00000105176.17
ENSG00000105185.11
ENSG00000105186.15
ENSG00000105193.8
ENSG00000105197.10
ENSG00000105202.8
ENSG00000105204.13
ENSG00000105220.15
ENSG00000105229.6
ENSG00000105245.9
ENSG00000105246.5
ENSG00000105248.15
ENSG00000105254.11
ENSG00000105255.10
ENSG00000105258.8
ENSG00000105270.14
ENSG00000105287.12
ENSG00000105290.11
ENSG00000105298.13
ENSG00000105321.13
ENSG00000105323.16
ENSG00000105327.17
ENSG00000105341.18
ENSG00000105364.13
ENSG00000105373.18
ENSG00000105379.9
ENSG00000105393.15
ENSG00000105397.13
ENSG00000105401.8
ENSG00000105402.7
ENSG00000105404.10
ENSG00000105419.17
ENSG00000105427.9
ENSG00000105429.12
ENSG00000105438.8
ENSG00000105447.12
ENSG00000105464.3
ENSG00000105472.12
ENSG00000105486.13
ENSG00000105514.7
ENSG00000105518.13
ENSG00000105520.10
ENSG00000105552.14
ENSG00000105559.11
ENSG00000105568.17
ENSG00000105576.15
ENSG00000105583.9
ENSG00000105612.8
ENSG00000105617.3
ENSG00000105618.13
ENSG00000105619.13
ENSG00000105640.12
ENSG00000105649.9
ENSG00000105655.18
ENSG00000105656.12
ENSG00000105662.15
ENSG00000105671.11
ENSG00000105677.11
ENSG00000105696.8
ENSG00000105698.15
ENSG00000105699.16
ENSG00000105700.10
ENSG00000105701.15
ENSG00000105705.15
ENSG00000105722.9
ENSG00000105723.11
ENSG00000105732.12
ENSG00000105738.10
ENSG00000105755.7
ENSG00000105767.2
ENSG00000105771.13
ENSG00000105810.9
ENSG00000105819.13
ENSG00000105821.14
ENSG00000105835.11
ENSG00000105849.5
ENSG00000105854.12
ENSG00000105855.9
ENSG00000105856.13
ENSG00000105879.11
ENSG00000105887.10
ENSG00000105894.11
ENSG00000105926.15
ENSG00000105928.14
ENSG00000105939.12
ENSG00000105948.13
ENSG00000105953.14
ENSG00000105968.18
ENSG00000105971.14
ENSG00000105974.11
ENSG00000105993.14
ENSG00000106003.12
ENSG00000106009.15
ENSG00000106025.8
ENSG00000106028.10
ENSG00000106049.8
ENSG00000106052.13
ENSG00000106066.14
ENSG00000106070.18
ENSG00000106077.18
ENSG00000106080.10
ENSG00000106089.11
ENSG00000106105.13
ENSG00000106144.19
ENSG00000106153.12
ENSG00000106211.8
ENSG00000106244.12
ENSG00000106245.10
ENSG00000106261.16
ENSG00000106263.17
ENSG00000106266.10
ENSG00000106268.15
ENSG00000106290.14
ENSG00000106299.7
ENSG00000106305.9
ENSG00000106330.11
ENSG00000106333.12
ENSG00000106344.8
ENSG00000106346.11
ENSG00000106348.16
ENSG00000106351.12
ENSG00000106355.9
ENSG00000106367.14
ENSG00000106392.10
ENSG00000106397.11
ENSG00000106399.11
ENSG00000106400.11
ENSG00000106443.16
ENSG00000106459.14
ENSG00000106460.18
ENSG00000106462.10
ENSG00000106484.15
ENSG00000106524.8
ENSG00000106537.7
ENSG00000106538.9
ENSG00000106554.12
ENSG00000106591.3
ENSG00000106603.18
ENSG00000106605.10
ENSG00000106608.16
ENSG00000106609.16
ENSG00000106615.9
ENSG00000106624.10
ENSG00000106628.10
ENSG00000106635.7
ENSG00000106636.7
ENSG00000106638.15
ENSG00000106665.15
ENSG00000106683.14
ENSG00000106688.11
ENSG00000106723.16
ENSG00000106771.12
ENSG00000106780.8
ENSG00000106799.12
ENSG00000106803.9
ENSG00000106804.7
ENSG00000106829.18
ENSG00000106868.16
ENSG00000106976.20
ENSG00000106991.13
ENSG00000106993.11
ENSG00000107020.9
ENSG00000107021.15
ENSG00000107105.14
ENSG00000107130.9
ENSG00000107140.15
ENSG00000107159.12
ENSG00000107164.15
ENSG00000107175.11
ENSG00000107185.9
ENSG00000107186.16
ENSG00000107201.9
ENSG00000107223.12
ENSG00000107281.9
ENSG00000107290.13
ENSG00000107295.9
ENSG00000107331.16
ENSG00000107338.9
ENSG00000107341.4
ENSG00000107362.13
ENSG00000107371.12
ENSG00000107372.12
ENSG00000107404.19
ENSG00000107438.8
ENSG00000107485.16
ENSG00000107537.13
ENSG00000107562.16
ENSG00000107566.13
ENSG00000107611.14
ENSG00000107625.12
ENSG00000107643.15
ENSG00000107651.12
ENSG00000107672.14
ENSG00000107738.19
ENSG00000107742.12
ENSG00000107745.18
ENSG00000107758.15
ENSG00000107771.16
ENSG00000107789.15
ENSG00000107796.13
ENSG00000107798.17
ENSG00000107815.8
ENSG00000107819.13
ENSG00000107833.10
ENSG00000107854.5
ENSG00000107862.4
ENSG00000107872.12
ENSG00000107874.10
ENSG00000107897.18
ENSG00000107902.13
ENSG00000107929.14
ENSG00000107937.18
ENSG00000107938.17
ENSG00000107949.16
ENSG00000107951.14
ENSG00000107957.16
ENSG00000107968.9
ENSG00000107984.9
ENSG00000108001.13
ENSG00000108010.11
ENSG00000108021.20
ENSG00000108055.9
ENSG00000108061.11
ENSG00000108064.10
ENSG00000108091.10
ENSG00000108094.14
ENSG00000108100.17
ENSG00000108106.13
ENSG00000108107.14
ENSG00000108175.16
ENSG00000108176.14
ENSG00000108179.13
ENSG00000108256.8
ENSG00000108262.15
ENSG00000108298.10
ENSG00000108312.14
ENSG00000108344.14
ENSG00000108349.16
ENSG00000108384.14
ENSG00000108389.9
ENSG00000108395.13
ENSG00000108406.9
ENSG00000108423.14
ENSG00000108424.9
ENSG00000108439.10
ENSG00000108443.13
ENSG00000108468.14
ENSG00000108479.11
ENSG00000108506.12
ENSG00000108510.9
ENSG00000108515.17
ENSG00000108518.7
ENSG00000108523.15
ENSG00000108528.13
ENSG00000108551.4
ENSG00000108557.18
ENSG00000108559.11
ENSG00000108561.8
ENSG00000108578.14
ENSG00000108582.11
ENSG00000108588.13
ENSG00000108590.10
ENSG00000108591.9
ENSG00000108592.16
ENSG00000108599.14
ENSG00000108602.17
ENSG00000108604.15
ENSG00000108639.7
ENSG00000108641.15
ENSG00000108651.9
ENSG00000108654.14
ENSG00000108666.9
ENSG00000108669.16
ENSG00000108671.9
ENSG00000108679.12
ENSG00000108733.9
ENSG00000108773.10
ENSG00000108774.14
ENSG00000108784.9
ENSG00000108797.11
ENSG00000108819.10
ENSG00000108821.13
ENSG00000108826.15
ENSG00000108829.9
ENSG00000108830.9
ENSG00000108840.15
ENSG00000108846.15
ENSG00000108848.15
ENSG00000108852.14
ENSG00000108854.15
ENSG00000108861.8
ENSG00000108946.14
ENSG00000108947.4
ENSG00000108953.16
ENSG00000108960.7
ENSG00000108963.17
ENSG00000109016.17
ENSG00000109046.14
ENSG00000109062.11
ENSG00000109065.11
ENSG00000109066.13
ENSG00000109072.13
ENSG00000109079.9
ENSG00000109083.13
ENSG00000109084.13
ENSG00000109089.7
ENSG00000109099.14
ENSG00000109103.11
ENSG00000109107.13
ENSG00000109111.14
ENSG00000109113.19
ENSG00000109133.12
ENSG00000109171.14
ENSG00000109180.14
ENSG00000109184.14
ENSG00000109220.10
ENSG00000109255.11
ENSG00000109265.14
ENSG00000109270.12
ENSG00000109320.11
ENSG00000109321.10
ENSG00000109323.9
ENSG00000109332.19
ENSG00000109381.19
ENSG00000109390.11
ENSG00000109436.7
ENSG00000109445.10
ENSG00000109458.8
ENSG00000109466.13
ENSG00000109472.13
ENSG00000109475.16
ENSG00000109501.13
ENSG00000109519.12
ENSG00000109534.16
ENSG00000109536.11
ENSG00000109572.13
ENSG00000109576.13
ENSG00000109586.11
ENSG00000109606.12
ENSG00000109610.5
ENSG00000109654.14
ENSG00000109674.3
ENSG00000109680.10
ENSG00000109685.17
ENSG00000109736.14
ENSG00000109738.10
ENSG00000109756.9
ENSG00000109775.10
ENSG00000109787.12
ENSG00000109790.16
ENSG00000109805.9
ENSG00000109814.11
ENSG00000109846.7
ENSG00000109854.13
ENSG00000109881.16
ENSG00000109919.9
ENSG00000109920.12
ENSG00000109929.9
ENSG00000110002.15
ENSG00000110013.12
ENSG00000110046.12
ENSG00000110047.17
ENSG00000110048.11
ENSG00000110057.7
ENSG00000110060.8
ENSG00000110063.8
ENSG00000110066.14
ENSG00000110074.10
ENSG00000110075.14
ENSG00000110076.18
ENSG00000110080.18
ENSG00000110090.12
ENSG00000110104.11
ENSG00000110107.8
ENSG00000110108.9
ENSG00000110172.11
ENSG00000110195.12
ENSG00000110200.8
ENSG00000110321.16
ENSG00000110328.5
ENSG00000110395.6
ENSG00000110400.10
ENSG00000110422.11
ENSG00000110429.13
ENSG00000110435.11
ENSG00000110442.11
ENSG00000110446.10
ENSG00000110492.15
ENSG00000110497.14
ENSG00000110514.19
ENSG00000110536.13
ENSG00000110583.12
ENSG00000110619.17
ENSG00000110628.13
ENSG00000110651.11
ENSG00000110696.9
ENSG00000110697.12
ENSG00000110700.6
ENSG00000110711.9
ENSG00000110713.15
ENSG00000110717.12
ENSG00000110721.11
ENSG00000110756.17
ENSG00000110768.11
ENSG00000110811.19
ENSG00000110841.13
ENSG00000110851.11
ENSG00000110852.4
ENSG00000110871.14
ENSG00000110876.9
ENSG00000110880.10
ENSG00000110906.12
ENSG00000110911.15
ENSG00000110917.7
ENSG00000110921.13
ENSG00000110925.6
ENSG00000110931.18
ENSG00000110944.8
ENSG00000110955.8
ENSG00000110958.15
ENSG00000111011.17
ENSG00000111057.10
ENSG00000111142.13
ENSG00000111144.9
ENSG00000111145.7
ENSG00000111196.9
ENSG00000111206.12
ENSG00000111229.15
ENSG00000111231.8
ENSG00000111237.18
ENSG00000111247.14
ENSG00000111261.13
ENSG00000111266.8
ENSG00000111269.2
ENSG00000111275.12
ENSG00000111276.10
ENSG00000111291.8
ENSG00000111300.9
ENSG00000111321.10
ENSG00000111328.6
ENSG00000111331.12
ENSG00000111335.12
ENSG00000111348.8
ENSG00000111358.13
ENSG00000111361.12
ENSG00000111364.15
ENSG00000111371.15
ENSG00000111445.13
ENSG00000111450.13
ENSG00000111481.9
ENSG00000111530.12
ENSG00000111540.15
ENSG00000111581.9
ENSG00000111596.12
ENSG00000111602.11
ENSG00000111605.16
ENSG00000111615.13
ENSG00000111639.7
ENSG00000111640.14
ENSG00000111642.15
ENSG00000111647.12
ENSG00000111652.9
ENSG00000111653.19
ENSG00000111665.11
ENSG00000111666.10
ENSG00000111667.13
ENSG00000111669.14
ENSG00000111670.15
ENSG00000111676.14
ENSG00000111679.16
ENSG00000111707.11
ENSG00000111711.9
ENSG00000111716.12
ENSG00000111725.10
ENSG00000111731.12
ENSG00000111737.11
ENSG00000111775.2
[truncated: 8,553 more rows]
