# Supplementary material for: Deep Generative Optimization of mRNA Codon Sequences for Enhanced Protein Production and Therapeutic Efficacy
Source: Research Square preprint supplement (doi:10.21203/rs.3.rs-5040961/v1), 2024-11-05
Supplement: Supplementary file 2 [file a013445d39d09003745ca583.xlsx]

## Sheet: coding sequence
	sequence	ID
Gluc	AUGGGAGUCAAAGUUCUGUUUGCCCUGAUCUGCAUCGCUGUGGCCGAGGCCAAGCCCACCGAGAACAACGAAGACUUCAACAUCGUGGCCGUGGCCAGCAACUUCGCGACCACGGAUCUCGAUGCUGACCGCGGGAAGUUGCCCGGCAAGAAGCUGCCGCUGGAGGUGCUCAAAGAGAUGGAAGCCAAUGCCCGGAAAGCUGGCUGCACCAGGGGCUGUCUGAUCUGCCUGUCCCACAUCAAGUGCACGCCCAAGAUGAAGAAGUUCAUCCCAGGACGCUGCCACACCUACGAAGGCGACAAAGAGUCCGCACAGGGCGGCAUAGGCGAGGCGAUCGUCGACAUUCCUGAGAUUCCUGGGUUCAAGGACUUGGAGCCCAUGGAGCAGUUCAUCGCACAG…	MF882921.1
	AUGGGCGUGAAGGUACUCUUCGCCCUGAUCUGUAUCGCUGUAGCCGAAGCUAAGCCUACUGAGAACAACGAAGACUUCAAUAUCGUUGCUGUUGCUAGCAACUUCGCGACUACUGAUUUGGAUGCUGAUAGGGGCAAGCUUCCUGGCAAGAAGCUCCCUUUGGAGGUCUUGAAGGAGAUGGAAGCCAAUGCCCGAAAGGCUGGUUGUACUCGUGGCUGUCUUAUCUGUCUCUCUCAUAUUAAGUGCACGCCUAAGAUGAAGAAGUUCAUUCCGGGUCGUUGCCACACCUACGAGGGCGAUAAGGAGUCUGCCCAGGGUGGUAUUGGUGAGGCCAUCGUCGAUAUUCCUGAGAUUCCUGGCUUCAAGGAUCUCGAGCCUAUGGAGCAGUUCAUCGCUCAG…	RD1
	AUGGGCGUCAAGGUACUCUUCGCCCUGAUCUGCAUCGCUGUCGCGGAGGCUAAGCCUACUGAGAAUAAUGAGGACUUCAAUAUUGUUGCUGUUGCUAGCAACUUUGCGACGACUGAUCUCGAUGCUGAUCGAGGCAAGCUUCCUGGCAAGAAGCUCCCUCUCGAGGUCUUGAAGGAGAUGGAAGCUAAUGCUCGUAAGGCUGGCUGUACUCGUGGAUGUCUGAUCUGUUUGUCGCAUAUUAAGUGUACGCCUAAGAUGAAGAAGUUUAUUCCUGGUAGGUGCCACACCUACGAGGGAGACAAGGAGUCUGCCCAGGGUGGCAUUGGCGAGGCGAUCGUCGAUAUUCCUGAGAUUCCUGGCUUUAAGGAUCUGGAGCCUAUGGAACAGUUCAUCGCUCAG…	RD2
	AUGGGCGUCAAGGUCCUGUUUGCCCUGAUCUGCAUCGCCGUCGCGGAGGCGAAGCCGACGGAGAACAAUGAGGAUUUCAACAUUGUUGCUGUGGCUUCGAACUUCGCGACGACUGAUCUCGAUGCAGAUCGGGGCAAACUUCCGGGCAAGAAGCUUCCCCUUGAGGUCCUCAAGGAGAUGGAAGCUAAUGCCCGGAAGGCUGGGUGUACUCGGGGAUGUCUGAUCUGCCUCUCGCACAUUAAGUGCACCCCGAAGAUGAAGAAAUUCAUCCCGGGGCGAUGCCACACCUACGAGGGCGACAAGGAGUCUGCCCAGGGUGGCAUCGGAGAGGCGAUCGUUGACAUCCCCGAGAUUCCUGGCUUCAAGGACCUUGAGCCCAUGGAGCAGUUCAUCGCGCAG…	RD3
	AUGGGCGUCAAGGUGCUCUUUGCCCUGAUCUGCAUCGCGGUCGCGGAGGCUAAGCCUACCGAAAACAACGAAGACUUCAACAUUGUUGCUGUUGCAAGCAACUUUGCGACAACUGACCUCGAUGCUGAUCGGGGCAAGCUUCCUGGCAAGAAGUUGCCUUUGGAGGUCUUGAAGGAGAUGGAGGCCAAUGCCCGUAAGGCUGGUUGUACUCGUGGCUGUCUUAUUUGUCUCUCUCAUAUUAAGUGCACGCCUAAGAUGAAGAAGUUCAUCCCUGGGCGUUGCCACACGUACGAGGGAGACAAGGAGAGCGCUCAGGGUGGUAUCGGCGAGGCCAUCGUCGAUAUCCCUGAGAUUCCUGGCUUCAAGGAUCUUGAGCCUAUGGAGCAGUUCAUCGCGCAG…	RD4
	AUGGGCGUCAAGGUGCUCUUUGCCCUGAUCUGCAUCGCGGUGGCGGAGGCGAAGCCCACGGAGAACAAUGAGGACUUCAACAUUGUUGCCGUGGCUUCGAACUUCGCCACCACUGACUUAGAUGCAGAUCGGGGCAAGCUUCCGGGGAAGAAGCUUCCCCUGGAAGUUCUCAAGGAGAUGGAGGCGAACGCUCGCAAGGCCGGUUGCACCCGUGGGUGCUUGAUUUGUCUCUCUCAUAUCAAGUGCACCCCCAAGAUGAAGAAAUUCAUCCCUGGGCGGUGUCACACUUAUGAGGGAGACAAAGAGAGCGCCCAGGGUGGGAUCGGCGAGGCGAUCGUCGACAUCCCUGAGAUCCCUGGGUUCAAGGACCUUGAGCCCAUGGAGCAGUUCAUCGCACAG…	LD1
	AUGGGGGUGAAGGUGCUGUUCGCCCUGAUCUGCAUCGCCGUGGCCGAGGCCAAGCCUACCGAGAACAAUGAGGACUUCAACAUUGUGGCCGUGGCCUCCAACUUCGCCACCACCGACCUGGACGCCGACAGGGGCAAGCUGCCUGGCAAGAAGCUGCCCCUGGAGGUGCUGAAGGAGAUGGAGGCCAACGCCCGGAAGGCUGGCUGCACACGGGGAUGCCUGAUCUGCCUGAGCCACAUCAAGUGCACCCCCAAGAUGAAGAAGUUCAUCCCCGGCCGGUGCCACACCUACGAGGGCGACAAGGAGUCCGCCCAGGGAGGCAUCGGGGAGGCCAUCGUGGACAUCCCCGAGAUCCCUGGGUUCAAGGACCUGGAGCCCAUGGAGCAGUUCAUCGCACAG…	LD2
	ATGGGCGTCAAGGTATTATTTGCCTTGATTTGCATTGCGGTTGCAGAAGCTAAACCTACTGAAAATAATGAAGATTTTAATATTGTTGCAGTGGCTTCAAATTTTGCCACAACTGACCTCGATGCAGATCGAGGCAAGCTTCCTGGCAAAAAGTTGCCTTTAGAGGTTCTTAAAGAAATGGAAGCAAATGCCCGTAAGGCTGGATGTACTCGAGGCTGCCTTATTTGTCTCTCTCATATAAAATGCACACCTAAAATGAAAAAATTTATTCCTGGTCGTTGCCATACCTATGAGGGAGACAAAGAGTCTGCGCAGGGTGGCATTGGCGAGGCCATCGTCGATATTCCAGAGATTCCTGGTTTTAAAGATTTGGAACCTATGGAACAATTTATCGCACAA…	HEK_A549_1
	ATGGGCGTTAAGGTTTTATTTGCCTTGATTTGCATCGCAGTTGCAGAAGCTAAGCCTACTGAAAATAATGAAGATTTTAACATTGTTGCAGTGGCTTCAAATTTTGCAACAACTGACCTCGATGCAGATCGAGGCAAACTTCCAGGCAAAAAGTTGCCTTTAGAAGTTCTTAAAGAAATGGAAGCAAATGCCCGTAAGGCTGGATGTACTCGAGGTTGCCTGATTTGTCTCTCTCATATTAAATGCACACCTAAAATGAAAAAATTTATTCCTGGTCGTTGCCATACCTATGAGGGAGACAAAGAGTCTGCGCAGGGTGGTATTGGCGAGGCCATCGTAGACATTCCAGAGATTCCTGGTTTTAAAGATTTAGAACCTATGGAACAATTTATCGCACAA…	HEK_A549_2
	ATGGGCGTAAAGGTTTTATTTGCTTTGATTTGCATCGCGGTCGCAGAAGCTAAGCCTACTGAAAATAATGAAGATTTTAATATTGTTGCAGTGGCTTCTAATTTTGCAACAACTGACCTCGATGCTGATCGAGGCAAACTTCCTGGCAAAAAGTTGCCTTTAGAGGTTCTTAAAGAAATGGAAGCAAATGCCCGTAAGGCTGGTTGTACTAGAGGTTGCCTTATTTGTCTTTCTCATATTAAATGCACACCTAAAATGAAAAAATTTATTCCTGGTCGTTGCCACACCTATGAGGGAGACAAAGAGTCTGCGCAGGGTGGTATTGGCGAGGCCATCGTCGATATTCCAGAGATTCCTGGTTTTAAGGATCTCGAACCTATGGAACAATTTATCGCACAA…	HEK_A549_3
	ATGGGCGTTAAGGTACTGTTTGCCTTGATCTGCATAGCTGTGGCTGAAGCTAAGCCGACAGAAAATAATGAGGATTTTAACATCGTTGCGGTGGCGTCGAATTTTGCGACGACCGACTTGGACGCAGATCGAGGCAAATTACCGGGCAAAAAGTTGCCATTAGAGGTACTTAAAGAAATGGAAGCTAATGCTCGTAAAGCTGGTTGTACTCGTGGTTGTCTTATTTGCCTGTCGCATATTAAATGCACGCCTAAAATGAAAAAATTCATTCCTGGTCGTTGCCACACCTATGAGGGCGACAAAGAGTCGGCGCAGGGTGGTATCGGCGAGGCGATCGTTGATATTCCTGAGATCCCTGGTTTCAAGGATTTGGAACCTATGGAACAGTTTATCGCACAG…	HEK_ARPE_1
	ATGGGGGTCAAGGTACTGTTTGCCTTGATCTGCATAGCTGTAGCAGAAGCTAAGCCTACAGAGAATAACGAGGATTTTAACATAGTGGCGGTGGCGTCTAACTTTGCGACAACCGATCTGGACGCAGATCGCGGCAAATTACCTGGCAAAAAGCTTCCATTAGAGGTTCTTAAAGAAATGGAAGCTAATGCTCGTAAAGCTGGTTGTACTCGAGGATGTCTTATTTGCCTGTCGCATATTAAATGCACACCGAAAATGAAGAAGTTTATTCCTGGTCGTTGCCATACCTATGAGGGCGACAAAGAGTCCGCTCAGGGTGGTATCGGCGAGGCGATCGTTGATATCCCTGAGATCCCTGGTTTTAAGGATTTGGAACCAATGGAACAGTTTATCGCACAA…	HEK_ARPE_2
	ATGGGGGTCAAGGTGCTGTTCGCCTTGATCTGTATAGCTGTAGCTGAAGCTAAGCCTACAGAGAATAATGAAGATTTTAACATTGTTGCCGTGGCTTCTAATTTTGCTACCACGGACCTGGATGCCGATCGCGGCAAGCTTCCCGGTAAAAAGCTTCCATTAGAAGTTCTTAAAGAGATGGAAGCTAACGCCAGGAAGGCCGGTTGTACTCGCGGATGTCTAATCTGCCTGTCGCATATCAAATGCACGCCGAAGATGAAAAAATTCATCCCTGGTCGTTGTCACACCTATGAAGGGGACAAGGAGAGCGCGCAGGGGGGTATCGGCGAAGCTATCGTCGACATCCCGGAAATTCCAGGTTTTAAAGACCTCGAACCAATGGAGCAATTTATCGCACAA…	HEK_ARPE_3
NGF	AUGUCCAUGUUGUUCUACACUCUGAUCACAGCUUUUCUGAUCGGCAUACAGGCGGAACCACACUCAGAGAGCAAUGUCCCUGCAGGACACACCAUCCCCCAAGCCCACUGGACUAAACUUCAGCAUUCCCUUGACACUGCCCUUCGCAGAGCCCGCAGCGCCCCGGCAGCGGCGAUAGCUGCACGCGUGGCGGGGCAGACCCGCAACAUUACUGUGGACCCCAGGCUGUUUAAAAAGCGGCGACUCCGUUCACCCCGUGUGCUGUUUAGCACCCAGCCUCCCCGUGAAGCUGCAGACACUCAGGAUCUGGACUUCGAGGUCGGUGGUGCUGCCCCCUUCAACAGGACUCACAGGAGCAAGCGGUCAUCAUCCCAUCCCAUCUUCCACAGGGGCGAAUUC…	WT
	AUGAGCAUGUUGUUCUAUACUCUAAUAACAGCUUUUCUGAUCGGCAUCCAGGCUGAACCCCAUAGCGAAAGCAACGUCCCGGCCGGACACACCAUCCCCCAAGCCCACUGGACCAAGUUACAACACUCCCUUGACACUGCGUUGCGCCGCGCCAGAAGCGCCCCGGCAGCAGCCAUAGCUGCACGAGUGGCUGGGCAAACCCGCAACAUCACUGUAGACCCCCGUCUAUUUAAGAAGCGCCGACUUCGUUCACCAAGGGUGCUGUUCAGUACCCAGCCUCCGCGAGAAGCUGCAGAUACCCAGGAUCUGGAUUUCGAGGUCGGUGGGGCUGCCCCCUUCAACCGCACUCAUAGGAGCAAGAGAUCUAGCUCCCAUCCGAUCUUCCACAGGGGAGAAUUC…	RD1
	AUGUCGAUGCUAUUUUAUACGCUGAUUACGGCGUUCCUGAUCGGGAUCCAGGCCGAACCCCACUCCGAGUCGAAUGUUCCGGCCGGGCAUACGAUCCCGCAGGCCCACUGGACAAAAUUACAACACUCUCUCGAUACCGCACUUCGACGCGCUCGCUCUGCUCCAGCGGCGGCCAUUGCGGCUCGUGUGGCCGGCCAGACUCGUAAUAUAACCGUCGAUCCUAGGCUGUUCAAGAAGAGGAGGUUGCGCAGCCCUCGUGUGCUGUUCAGUACGCAGCCUCCUCGCGAAGCUGCUGAUACUCAAGAUCUCGACUUCGAAGUUGGAGGUGCGGCUCCCUUCAAUCGGACACAUCGUAGUAAGCGUUCUAGUAGCCAUCCGAUCUUCCAUCGCGGCGAGUUC…	RD2
	AUGUCUAUGCUCUUCUACACUCUGAUCACAGCCUUCCUGAUCGGCAUACAGGCCGAGCCCCACUCGGAGUCCAAUGUGCCUGCGGGGCAUACGAUCCCGCAGGCACAUUGGACGAAGUUACAGCAUUCGCUGGAUACUGCACUUCGCCGAGCGCGCUCCGCCCCCGCGGCGGCCAUCGCCGCCCGGGUGGCGGGGCAGACUCGCAACAUCACUGUCGACCCUAGGCUGUUCAAAAAGCGGCGGCUUCGGUCGCCUCGGGUGUUGUUCUCGACCCAGCCUCCCCGGGAGGCGGCUGACACCCAGGACCUCGACUUCGAGGUCGGAGGGGCCGCCCCCUUCAACCGGACGCACCGUUCGAAGCGGUCGUCGUCGCACCCGAUCUUCCAUCGCGGGGAGUUU…	RD3
	AUGAGUAUGCUCUUCUAUACUCUGAUUACGGCCUUCCUGAUCGGUAUCCAGGCGGAACCCCACUCCGAGUCCAAUGUGCCUGCGGGACAUACGAUCCCGCAGGCGCAUUGGACGAAGUUACAACAUUCACUGGAUACCGCGUUGCGACGGGCGCGGUCCGCGCCCGCGGCGGCCAUCGCGGCGCGUGUUGCGGGUCAGACCCGCAACAUUACUGUCGACCCUAGGCUGUUCAAGAAGAGGCGGCUUAGGUCGCCUCGGGUGCUGUUCAGUACCCAGCCUCCUCGCGAGGCGGCCGAUACCCAGGACCUCGAUUUCGAGGUCGGGGGUGCGGCCCCCUUCAACCGUACUCAUAGAUCGAAGCGCUCGUCGUCGCAUCCGAUCUUCCAUCGCGGCGAGUUU…	RD4
	AUGAGCAUGUUGUUCUACACGCUCAUCACGGCCUUCCUCAUCGGCAUCCAGGCUGAGCCGCACAGCGAGUCCAAUGUGCCUGCGGGACACACGAUCCCGCAGGCACAUUGGACUAAGCUGCAGCACUCCCUGGACACGGCGCUGCGUCGAGCGCGGAGCGCGCCGGCGGCCGCAAUCGCCGCUAGAGUCGCGGGUCAAACCCGUAACAUUACGGUUGACCCGCGACUCUUCAAGAAGCGGCGAUUGCGGUCGCCGCGCGUUCUGUUCUCGACGCAGCCCCCCAGGGAGGCUGCAGACACCCAAGACCUCGACUUCGAGGUCGGGGGUGCCGCGCCGUUCAACCGGACGCACCGCAGCAAGCGGUCUUCUUCCCAUCCGAUCUUUCACAGAGGUGAGUUU…	LD1
	AUGAGCAUGCUGUUCUACACCCUGAUCACGGCCUUCCUGAUCGGUAUCCAGGCUGAGCCCCACAGCGAGUCCAAUGUGCCUGCGGGACACACCAUCCCGCAGGCACAUUGGACUAAGCUGCAGCACAGCCUGGAUACCGCCCUGCGGCGGGCGCGGAGCGCGCCCGCCGCAGCCAUCGCCGCCCGGGUGGCUGGGCAGACCCGGAACAUCACCGUGGACCCUCGGCUGUUUAAGAAGAGACGGCUGAGGAGUCCACGGGUGCUGUUCUCUACCCAGCCACCCCGGGAGGCCGCUGACACACAGGACCUCGACUUCGAGGUGGGGGGCGCUGCUCCUUUUAACCGGACCCACCGGUCUAAGAGGAGCAGCAGCCACCCCAUCUUCCACCGGGGCGAGUUC…	LD2
HA	AUGAAGGCAAACCUACUGGUCCUGUUAUGUGCACUUGCAGCUGCAGAUGCAGACACAAUAUGUAUAGGCUACCAUGCGAACAAUUCAACCGACACUGUUGACACAGUGCUCGAGAAGAAUGUGACAGUGACACACUCUGUUAACCUGCUCGAAGACAGCCACAACGGAAAACUAUGUAGAUUAAAAGGAAUAGCCCCACUACAAUUGGGGAAAUGUAACAUCGCCGGAUGGCUCUUGGGAAACCCAGAAUGCGACCCACUGCUUCCAGUGAGAUCAUGGUCCUACAUUGUAGAAACACCAAACUCUGAGAAUGGAAUAUGUUAUCCAGGAGAUUUCAUCGACUAUGAGGAGCUGAGGGAGCAAUUGAGCUCAGUGUCAUCAUUCGAAAGAUUCGAAAUA…	WT
	AUGAAGGCGAACUUGCUGGUACUGCUGUGCGCUCUCGCCGCGGCCGACGCCGACACGAUUUGUAUCGGUUAUCAUGCGAACAACUCGACUGAUACUGUCGAUACUGUUUUGGAGAAGAAUGUUACUGUUACUCACUCUGUAAAUUUGCUCGAAGACUCCCACAACGGCAAAUUGUGCCGUCUCAAGGGGAUCGCGCCUUUGCAGUUGGGCAAGUGCAAUAUAGCCGGAUGGCUUCUUGGAAAUCCGGAGUGCGAUCCUCUUCUUCCUGUCCGUAGUUGGAGCUACAUAGUGGAGACCCCAAAUUCUGAGAACGGGAUCUGCUAUCCCGGAGACUUCAUCGACUACGAGGAGUUGAGAGAGCAACUCUCUAGUGUCAGUAGUUUCGAGAGGUUUGAAAUC…	RD1
	AUGAAGGCGAACCUGCUGGUACUGCUGUGCGCUCUCGCCGCGGCCGACGCCGAUACGAUCUGUAUCGGCUAUCAUGCGAACAAUUCGACUGAUACUGUAGAUACUGUUUUGGAGAAGAAUGUCACUGUGACUCACUCUGUAAACCUGUUGGAAGAUUCCCACAAUGGCAAAUUGUGCCGUCUGAAGGGGAUCGCGCCUCUCCAGUUGGGCAAGUGCAACAUAGCAGGCUGGCUUCUUGGAAAUCCUGAGUGCGAUCCUCUUCUUCCUGUACGCAGUUGGAGCUACAUUGUGGAGACCCCAAAUUCUGAGAACGGUAUCUGCUACCCCGGAGACUUCAUCGACUACGAGGAGCUUCGCGAGCAGCUGUCUAGUGUCUCUAGUUUCGAGAGGUUUGAAAUC…	RD2
	AUGAAGGCGAACCUGCUGGUCCUGCUGUGCGCGCUGGCAGCGGCCGAUGCAGACACUAUCUGCAUCGGCUAUCAUGCGAACAAUUCGACCGAUACGGUCGACACUGUCCUCGAGAAGAAUGUGACAGUGACACACUCUGUCAAUCUUCUCGAGGACAGCCACAACGGUAAGUUGUGCCGGCUGAAGGGGAUUGCUCCCCUUCAGCUGGGCAAGUGCAACAUAGCCGGGUGGCUUCUGGGAAACCCAGAGUGCGACCCGCUGCUGCCAGUGCGCAGUUGGAGCUACAUCGUGGAGACCCCCAAUUCCGAGAACGGGAUCUGCUACCCGGGCGACUUCAUCGACUACGAGGAGUUGCGGGAGCAGCUGUCGAGCGUGAGCAGUUUCGAGAGGUUCGAAAUC…	RD3
	AUGAAGGCCAACUUGCUGGUCCUGCUGUGCGCGUUGGCCGCGGCGGAUGCCGAUACGAUUUGUAUCGGCUAUCAUGCGAACAAUUCGACUGAUACAGUCGACACUGUCCUCGAGAAGAAUGUCACUGUGACUCACAGUGUCAAUCUUCUCGAGGACUCGCACAACGGCAAGUUGUGCCGGCUGAAGGGGAUCGCACCUCUCCAGCUCGGCAAGUGCAACAUAGCCGGCUGGCUUCUGGGCAACCCAGAGUGCGAUCCCCUUCUGCCGGUUCGCAGUUGGAGUUACAUUGUGGAGACUCCAAAUUCGGAGAACGGGAUCUGCUACCCUGGUGACUUCAUCGACUACGAGGAGUUGAGGGAGCAGCUCUCGAGCGUCAGCUCGUUCGAGAGGUUUGAAAUC…	RD4
	AUGAAGGCGAACCUCCUUGUCCUUCUCUGUGCGUUGGCGGCAGCCGAUGCAGAUACGAUCUGCAUCGGCUACCACGCCAACAACAGCACAGAUACCGUUGAUACUGUCCUCGAGAAGAAUGUCACUGUGACGCACAGUGUCAAUCUUCUCGAGGACAGUCACAACGGUAAGCUUUGCCGGCUGAAGGGGAUCGCUCCCCUUCAGCUGGGGAAGUGUAACAUAGCCGGCUGGCUGUUGGGCAAUCCCGAGUGCGACCCGCUCCUCCCGGUGAGGAGCUGGUCGUACAUCGUGGAGACGCCCAACAGCGAGAACGGCAUAUGUUACCCGGGGGACUUUAUUGACUACGAGGAGCUUCGGGAGCAGCUGUCCUCCGUCUCCAGCUUCGAGAGGUUCGAGAUU…	LD1
	AUGAAGGCCAAUCUGCUGGUCCUGCUGUGCGCACUGGCAGCCGCCGAUGCAGAUACCAUCUGCAUCGGCUACCACGCCAACAACAGCACCGACACAGUGGACACCGUGCUGGAGAAGAAUGUGACUGUCACUCACAGCGUGAACCUGCUGGAGGACAGUCACAACGGCAAGCUGUGUCGGCUGAAGGGGAUCGCUCCCCUGCAGCUGGGCAAGUGUAACAUCGCUGGCUGGCUGCUGGGGAACCCCGAGUGCGAUCCCCUGCUGCCAGUGCGCAGCUGGAGCUACAUCGUGGAGACCCCCAACAGCGAGAACGGCAUCUGCUACCCCGGCGACUUCAUUGACUAUGAGGAGCUGCGGGAGCAGCUGUCCUCCGUCUCCAGCUUCGAGCGGUUCGAGAUC…	LD2
Fluc	AUGGAAGACGCCAAAAACAUAAAGAAAGGCCCGGCGCCAUUCUAUCCGCUGGAAGAUGGAACCGCUGGAGAGCAACUGCAUAAGGCUAUGAAGAGAUACGCCCUGGUUCCUGGAACAAUUGCUUUUACAGAUGCACAUAUCGAGGUGGACAUCACUUACGCUGAGUACUUCGAAAUGUCCGUUCGGUUGGCAGAAGCUAUGAAACGAUAUGGGCUGAAUACAAAUCACAGAAUCGUCGUAUGCAGUGAAAACUCUCUUCAAUUCUUUAUGCCGGUGUUGGGCGCGUUAUUUAUCGGAGUUGCAGUUGCGCCCGCGAACGACAUUUAUAAUGAACGUGAAUUGCUCAACAGUAUGGGCAUUUCGCAGCCUACCGUGGUGUUCGUUUCCAAAAAGGGGUUG…	WT
	AUGGAGGAUGCUAAGAACAUCAAGAAGGGGCCGGCGCCAUUUUACCCCUUGGAGGACGGUACUGCCGGGGAGCAGCUGCAUAAGGCUAUGAAGCGUUAUGCGCUGGUCCCCGGCACUAUCGCCUUCACGGACGCUCAUAUCGAAGUAGACAUCACGUAUGCUGAGUACUUCGAGAUGAGCGUCCGUCUCGCUGAGGCCAUGAAGCGGUACGGUUUGAACACAAACCACCGCAUCGUGGUCUGCAGCGAGAACAGUCUUCAGUUCUUUAUGCCGGUGCUCGGCGCCCUGUUCAUCGGGGUCGCCGUAGCACCGGCAAAUGAUAUUUAUAAUGAGCGGGAGCUUCUUAACAGCAUGGGGAUCUCGCAGCCCACUGUUGUUUUCGUGAGCAAGAAGGGGCUG…	RD1
	AUGGAGGACGCCAAGAACAUCAAGAAGGGGCCCGCCCCCUUCUACCCCCUGGAGGACGGCACCGCCGGCGAGCAGCUGCACAAGGCCAUGAAGCGGUACGCCCUGGUGCCAGGCACCAUCGCCUUCACCGACGCUCACAUCGAGGUGGACAUCACCUACGCCGAGUACUUCGAGAUGAGCGUGCGGCUGGCCGAGGCCAUGAAGCGGUACGGCCUGAACACCAACCACCGCAUCGUGGUGUGCAGCGAGAACUCCCUGCAGUUCUUCAUGCCCGUGCUGGGCGCCCUGUUCAUUGGGGUGGCCGUGGCCCCCGCCAACGACAUCUACAAUGAGCGGGAGCUGCUGAACAGCAUGGGCAUCAGCCAGCCCACCGUGGUGUUCGUGUCCAAGAAGGGGCUG…	RD2

## Sheet: UTR
UTR	5’	GGGAAAUAAGAGAGAAAAGAAGAGUAAGAAGAAAUAUAAGACCCCGGCGCCGCCACC
	3’	GCUGGAGCCUCGGUGGCCUAGCUUCUUGCCCCUUGGGCCUCCCCCCAGCCCCUCCUCCCCUUCCUGCACCCGUACCCCCGUGGUCUUUGAAUAAAGUCUGAGUGGGCGGCA
